1 Genetic variation in a complex polyploid: unveiling the dynamic allelic features of  
2 sugarcane

3

4 Danilo Augusto Sforça,<sup>a</sup> Sonia Vautrin,<sup>b</sup> Claudio Benicio Cardoso-Silva,<sup>a</sup> Melina  
5 Cristina Mancini,<sup>a</sup> María Victoria Romero da Cruz,<sup>a</sup> Guilherme da Silva Pereira,<sup>c</sup>  
6 Mônica Conte,<sup>a</sup> Arnaud Bellec,<sup>b</sup> Nair Dahmer,<sup>a</sup> Joelle Fourment,<sup>b</sup> Nathalie Rodde,<sup>b</sup>  
7 Marie-Anne Van Sluys,<sup>d</sup> Renato Vicentini,<sup>a</sup> Antônio Augusto Franco Garcia,<sup>c</sup> Eliana  
8 Regina Forni-Martins,<sup>a</sup> Monalisa Sampaio,<sup>e</sup> Hermann Hoffmann,<sup>e</sup> Luciana Rossini  
9 Pinto,<sup>f</sup> Marcos Guimarães de Andrade Landell,<sup>f</sup> Michel Vincentz,<sup>a</sup> Helene Berges,<sup>b</sup>  
10 Anete Pereira Souza<sup>a</sup>

11

12 <sup>a</sup>Universidade Estadual de Campinas (UNICAMP), Campinas, SP, Brazil

13 <sup>b</sup>Centre National de Ressources Genomiques Vegetales (CNRGV), Institut  
14 National de la Recherche Agronomique (INRA), Castanet Tolosan, France

15 <sup>c</sup>Escola Superior de Agricultura Luiz de Queiroz (ESALQ), USP, Piracicaba, SP,  
16 Brazil

17 <sup>d</sup>Universidade de São Paulo, USP, São Paulo, SP, Brazil

18 <sup>e</sup>Universidade Federal de São Carlos (UFSCAR), Araras, SP, Brazil

19 <sup>f</sup>Centro de Cana, Instituto Agrônômico de Campinas, São Paulo, SP, Brazil

20

21 Corresponding author: [anete@unicamp.br](mailto:anete@unicamp.br)

22

23 Short title: Unveiling the allelic dynamics of sugarcane

24

25

---

The author responsible for distribution of materials integral to the findings presented in this article in accordance with the policy described in the Instructions for Authors ([www.plantcell.org](http://www.plantcell.org)) is Anete Pereira de Souza ([anete@unicamp.br](mailto:anete@unicamp.br)).

26 **ABSTRACT**

27 Sugarcane (*Saccharum spp.*) is highly polyploid and aneuploid. Modern cultivars  
28 are derived from hybridization between *S. officinarum* ( $x = 10$ ,  $2n = 80$ ) and *S.*  
29 *spontaneum* ( $x = 8$ ,  $2n = 40-128$ ). The hypothetical *HP600* and centromere protein  
30 C (*CENP-C*) genes from sugarcane were used to elucidate the allelic expression  
31 and genomic and genetic behavior of this complex polyploid. The genomically side-  
32 by-side genes *HP600* and *CENP-C* were found in two different homeologous  
33 chromosome groups with ploidies of eight and ten. The first region (Region01) was  
34 a *Sorghum bicolor* ortholog with all haplotypes of *HP600* and *CENP-C* expressed,  
35 but *HP600* exhibited an unbalanced haplotype expression. The second region  
36 (Region02) was a scrambled sugarcane sequence formed from different  
37 noncollinear genes containing duplications of *HP600* and *CENP-C* (paralogs). This  
38 duplication occurred before the *Saccharum* genus formation and after the  
39 separation of sorghum and sugarcane, resulting in a nonexpressed *HP600*  
40 pseudogene and a recombined fusion version of *CENP-C* and orthologous gene  
41 Sobic.003G299500 with at least two chimerical gene haplotypes expressed. The  
42 genetic map construction supported the difficulty of mapping markers located in  
43 duplicated regions of complex polyploid genomes. We thus present an integrated  
44 approach to elucidate the homeolog dynamics of polyploid genomes.

45

## 46 INTRODUCTION

47 The *Saccharum* species are C4 grass and present a high level of ploidy. *S.*  
48 *officinarum* is octaploid ( $2n = 80$ ), with  $x = 10$  chromosomes, while *S. spontaneum*  
49 has  $x = 8$  but presents great variation in the number of chromosomes, with main  
50 cytotypes of  $2n = 62, 80, 96, 112$  or  $128$ . The modern sugarcane cultivars  
51 originated from hybridization between these two species and are considered  
52 allopolyploid hybrids (Daniels and Roach, 1987; Paterson et al., 2013). The  
53 development of these cultivars involved the process of 'nobilization' of the hybrid,  
54 with successive backcrosses using *S. officinarum* as the recurrent parent (Bremer,  
55 1961). The resulting hybrids are highly polyploid and aneuploid (D'Hont et al.,  
56 1998; Irvine, 1999; Grivet and Arruda, 2002) and have an estimated whole genome  
57 size of 10 Gb (D'Hont and Glaszmann, 2001). An in situ hybridization study has  
58 shown that the genomes of the commercial hybrids consist of 10-20%  
59 chromosomes from *S. spontaneum* and 5-17% recombinant chromosomes  
60 between the two species, while the remaining majority of the genome consists of  
61 chromosomes from *S. officinarum* (Piperidis and D'Hont, 2001; D'Hont, 2005).

62 Molecular evidence suggests that polyploid genomes can present dynamic  
63 changes in DNA sequence and gene expression, probably in response to genomic  
64 shock (genomic remodeling due to the activation of previously deleted  
65 heterochromatic elements), and this phenomenon is implicated in epigenetic  
66 changes in homologous genes due to intergenomic interactions (McClintock,  
67 1984). The evolutionary success of polyploid species is related to their ability to  
68 present greater phenotypic novelty than is observed in their diploid or even absent  
69 in parents (Ramsey and Schemske, 2002). Among other factors, this increase in  
70 the capacity for phenotypic variation capacity may be caused by regulation of the  
71 allelic dosage (Birchler et al., 2005).

72 The Brazilian sugarcane variety SP80-3280 is derived from a cross between  
73 the varieties SP71-1088  $\times$  H57-5028 and is resistant to brown rust, caused by  
74 *Puccinia melanocephala* (Landel et al., 2005). SP80-3280 was chosen for  
75 transcriptome sequencing by SUCEST-FUN (Vettore et al., 2003) and RNAseq  
76 (Cardoso-Silva et al., 2014; Nishiyama et al., 2014; Matiello et al., 2015). Biparental

77 crossing of SP80-3280 has also been used to analyze rust resistance (Balsalobre  
78 et al., 2016), quantitative trait loci (QTL) mapping (Costa et al., 2016) and  
79 genotyping by sequencing (GBS) (Balsalobre et al., 2017). A Brazilian initiative  
80 (Souza et al., 2011) is producing a gene-space genome sequence from SP80-  
81 3280, and a draft sugarcane genome based on whole-genome shotgun  
82 sequencing was produced (Riaño-Pachón and Mattiello, 2017). In addition, QTL  
83 gene synteny from sorghum has been used to map corresponding BACs in SP80-  
84 3280 (Mancini et al., 2018).

85 Three bacterial artificial chromosome (BAC) libraries for different sugarcane  
86 varieties have been constructed. The oldest one is for the French variety R570  
87 (Tomkins et al., 1999) and contains 103,296 clones with an average insert size of  
88 130 kb, representing 1.2 total genome equivalents. A mix of four individuals  
89 derived from the self-fertilization of the elite cultivar R570 (pseudo F2) was  
90 reported by Le Cunff et al. (2008) and contains 110,592 clones with an average  
91 insert size of 130 kb, representing 1.4x coverage of the whole genome. In addition,  
92 a library of SP80-3280 published by Figueira et al. (2012) contains 36,864 clones  
93 with an average insert size of 125 kb, representing 0.4 total genome equivalent  
94 coverage.

95 Sugarcane and sorghum (*Sorghum bicolor*) share a high level of collinearity,  
96 gene structure and sequence conservation. de Setta et al. (2014) contributed to  
97 understanding the euchromatic regions from R570 and a few repetitive-rich  
98 regions, such as centromeric and ribosomal regions, other than defining a basic  
99 transposable element dataset. The genomic similarity between sugarcane and  
100 sorghum has been frequently used to characterize the sugarcane genome (Jannoo  
101 et al., 2007; Garsmeur et al., 2011; Vilela et al., 2017, Mancini et al., 2018),  
102 demonstrating the high synteny of sugarcane x sorghum and high gene structure  
103 retention among the different sugarcane homeologs. In addition, these works  
104 contribute to understanding the genomic and evolutionary relationships among  
105 important genes in sugarcane using BAC libraries.

106 The segregation of chromosomes during cell division is facilitated by the  
107 attachment of mitotic spindle microtubules to the kinetochore at the chromosomal

108 centromere. Only CenH3 (histone H3) and *CENP-C* (centromere protein C) have  
109 been shown to bind centromeric DNA (Talbert et al., 2004). The centromere is  
110 marked with the histone H3 variant CenH3 (*CENP-A* in human), and *CENP-C*  
111 forms part of the inner kinetochore. The *CENP-C* "central domain" makes close  
112 contact with the acidic patch of histones H2A/H2B, and the highly conserved  
113 "*CENP-C* motif" senses both the acidic patch and recognizes the hydrophobicity of  
114 the otherwise nonconserved CenH3 tail, supporting a conserved mechanism of  
115 centromere targeting by the kinetochore (Gopalakrishnan et al., 2009; Kato et al.,  
116 2013; Sandmann et al., 2017). Sandmann et al. (2017) reported that in *Arabidopsis*  
117 *thaliana*, KNL2, a protein with a *CENPC-k* motif, recognizes centromeric  
118 nucleosomes such as the *CENP-C* protein. The *CENP-C* gene genomic structure  
119 in sugarcane has not been detailed.

120 Genome organization and expression dynamics are poorly understood in  
121 complex polyploid organisms, such as sugarcane, mainly because reconstructing  
122 large and complex regions of the genome is a challenge. However, an intriguing  
123 question is how such a complex genome can function while handling different copy  
124 numbers of genes, different allelic dosages and different ploidies of its  
125 homo/homeolog groups. For that reason, we examined the genome, transcriptome,  
126 evolutionary pattern and genetic interactions/relationships of a *CENP-C*-containing  
127 region in a genomic region of the SP80-3280 sugarcane variety (a *Saccharum*  
128 hybrid). First, we defined the genome architecture and evolutionary relationships of  
129 two physically linked genes, *HP600* (unknown function) and *CENP-C*, in detail.  
130 Second, we used the sugarcane SP80-3280 transcriptome to investigate  
131 transcription and genomic interactions in each gene (*HP600* and *CENP-C*).  
132 Ultimately, we used SNP distribution from these genes to compare the genetic and  
133 physical maps.

134

## 135 **RESULTS**

136

### 137 **BAC library construction**

138 The BAC library from the sugarcane variety SP80-3280 resulted in 221.184 clones,  
139 arrayed in 576 384-well microtiter plates, with a mean insert size of 110 kb. This  
140 BAC library is approximately 2.4 genome equivalents (10 Gb) and 26 monoploid  
141 genome equivalents (930 Mb, Figueira et al., 2012). For the sugarcane variety  
142 IACSP93-3046, the library construction resulted in 165.888 clones arrayed in 432  
143 384-well microtiter plates, with a mean insert size of 110 kb, which is approximately  
144 1.8 genome equivalents and 19 monoploid genome equivalents.

145 BAC-end sequencing (BES) results in an overview of the genome and  
146 validates the clones obtained through library construction. The SP80-3280 BAC  
147 library yielded 650 (84.6%) good BES sequences, of which 319 sequences have  
148 repetitive elements, and 92 exhibited similarities with sorghum genes. Excluding  
149 hits for more than one gene (probably duplicated genes or family genes), 65  
150 sequences could be mapped to the *S. bicolor* genome (Supplemental Figure 1).  
151 The BAC library for IACSP93-3046 yielded 723 (94%) good BES sequences, of  
152 which 368 sequences exhibited the presence of repetitive sequences, and 111  
153 exhibited a similarity with some gene. Excluding genes with hits with more than  
154 one gene, 74 of the sequences could be mapped to the *S. bicolor* genome  
155 (Supplemental Figure 1).

156

### 157 **BAC annotation**

158 The gene HP600 was used as target gene and showed strong evidence of being a  
159 single-copy gene when the transcripts of HP600 of sorghum, rice and sugarcane  
160 was compared. Twenty-two BAC clones from the SP80-3280 library that had the  
161 target gene *HP600* (NCBI from MH463467 to MH463488) and a previously  
162 sequenced BAC (Mancini et al., 2018; NCBI Accession Number MF737011) were  
163 sequenced by Roche 454 sequencing (detailed assembly can be found in  
164 Supplemental Table 1). The BACs varied in size from 48 kb (Shy171E23) to 162 kb  
165 (Shy432H18), with a mean size of 109 kb. The BACs were compared, and BACs  
166 with at least 99% similarity were considered the same haplotype (Figure 1 and  
167 Figure 2), resulting in sixteen haplotypes. Indeed, the possibility of one homeolog

168 being more than 99% similar to another exists, but a real haplotype cannot be  
169 distinguished from an assembly mismatch.

170 Comparisons of the BAC sequences against the sugarcane SP80-3280  
171 genome draft using BLASTN (Riaño-Pachón and Mattiello, 2017) resulted in  
172 matches within gene regions, but no genome contig covered a whole BAC, and the  
173 BAC transposable elements (TEs) matched with several genome contigs  
174 (Supplemental Figure 2). The matches with genes provide further support for our  
175 assembly process.

176 The BACs were first annotated regarding the TEs. The TEs accounted for  
177 21% to 65% of the sequenced bases with a mean of 40% (Supplemental Table 1).  
178 Annotation of the TEs in the 22 BACs revealed 618 TEs (220 TEs were grouped in  
179 the same type) with sizes ranging from 97 bp to 18,194 bp.

180 Gene annotation (Supplemental Table 2 and Supplemental Table 3)  
181 resulted in three to nine genes per BAC with a mean of five genes per BAC  
182 (Supplemental Table 1). The gene Sobic.003G221500, which was used to screen  
183 the library, codes for a hypothetical protein called *HP600* in sugarcane that has  
184 been found to be expressed in sorghum and rice. A phylogenetic analysis using  
185 sorghum, rice and *Arabidopsis thaliana* transcripts revealed that this gene is  
186 probably a single-copy gene. The gene Sobic.003G221600 is a *CENP-C* ortholog  
187 in sugarcane (*S. officinarum*, haplotypes CENP-C1 and CENP-C2, described by  
188 Talbert et al., 2004). The *HP600* and *CENP-C* sugarcane genes, as in *S. bicolor*  
189 and *Oryza sativa*, were found to be side by side in the sugarcane haplotypes.

190

## 191 **Relationship between Region01 and Region02**

192 Annotation of *HP600* and *CENP-C* in the sixteen BAC haplotypes revealed two  
193 groups of BACs. One group had the expected exon/intron organization when  
194 compared with *S. bicolor HP600* (five exons in sorghum) and *CENP-C* (fourteen  
195 exons in sorghum). This region was further designated as Region01 (Supplemental  
196 Table 1 - 10 BACs and 7 haplotypes – Figure 1 - haplotype I to haplotype VII). The  
197 other group was found to have fewer exons than expected (when compared with *S.*  
198 *bicolor*) for both *HP600* and *CENP-C*, and it was designated Region02

199 (Supplemental Table 1 - 13 BACs and 9 haplotypes – Figure 1 - haplotype VIII to  
200 haplotype XVI).

201 A comparison of the BAC haplotypes from Region01 and Region02 revealed  
202 an 8-kb shared region. The 8-kb duplication spanned from the last three exons of  
203 *HP600* to the last seven exons of *CENP-C*. *HP600* and *CENP-C* were physically  
204 linked, but the orientation of the genes was opposite (Supplemental Figure 3, panel  
205 B). A phylogenetic tree was constructed to examine the relationships among this 8-  
206 kb region (Supplemental Figure 3, panel A). The orthologous region from *S. bicolor*  
207 was used as an outgroup, and the separation in the two groups (Region01 and  
208 Region02) suggests that the shared 8-kb sequence appeared as the consequence  
209 of a sugarcane-specific duplication.

210 Region01 exhibited high gene collinearity with *S. bicolor*. However, in the  
211 BAC haplotype VII, a change in gene order involving the sorghum orthologs  
212 Sobic.003G221800 and Sobic.003G221400 was observed (Figure 1, dotted line).  
213 We were unable to determine whether this alteration resulted from a duplication or  
214 a translocation since we do not have a single haplotype that covers the entire  
215 region. Sobic.003G221800 is missing in this position from haplotypes I, II and VI.

216 Region01 and Region02, except for the genes *HP600* and *CENP-C*, contain  
217 different sorghum orthologous genes (Figure 1). Region02 was found to be  
218 noncollinear with *S. bicolor* (Figure 1 and Figure 2), which reinforces the notion of a  
219 specific duplication in sugarcane. Region02 appeared as a mosaic formed by  
220 different sorghum orthologous genes distributed in different chromosomes and  
221 arose by duplication after the separation of sorghum and sugarcane.

222 In Region02, the Sobic.008G134300 orthologous gene was found only in  
223 haplotype VIII, and the Sobic.008G134700 ortholog was found in a different  
224 position in haplotype IX (Figure 1, dotted line in Region02 and Figure 2). The  
225 phylogenetic analysis of Sobic.008G134700 and sugarcane orthologs  
226 demonstrated that sugarcane haplotype IX are more closely related to sorghum  
227 than to other sugarcane homeologs (Supplemental Figure 4). In addition, the  
228 orientation of transcription of the Sobic.008G134700 ortholog in haplotype IX is  
229 opposite that of the other sugarcane haplotypes (Figure 1 and Figure 2). This



230 finding suggests that this gene could be duplicated (paralogs) or translocated  
231 (orthologs) in haplotypes X, XIV, XV and XVI. No *S. bicolor* orthologous region that  
232 originated from Region02 could be determined, since it contained genes from  
233 multiple sorghum chromosomes.

234 Twenty long terminal repeat (LTR) retrotransposons were located in the two  
235 regions, but no LTR retrotransposons were shared among the haplotypes from  
236 Region01 and Region02, suggesting that all LTR retrotransposon insertions  
237 occurred after the duplication. In addition, ancient LTR retrotransposons could be  
238 present, but the sequences among the sugarcane haplotypes are so divergent that  
239 they could not be identified. The oldest LTR retrotransposon insertions were dated  
240 from 2.3 Mya (from haplotype VIII from Region02, a DNA/MuDR transposon,  
241 similar to MUDR1N\_SB), which means that there is evidence that this duplication is  
242 at least 2.3 Mya old. Four LTR retrotransposons similar to RLG\_scAle\_1\_1-LTR  
243 had identical sequences (Region01: Sh083P14\_TE0360 – haplotype III and  
244 Sh040F02\_TE0180 – haplotype XI; Region02: Sh285K15\_TE0060 – haplotype XII  
245 and Sh452C23\_TE0090 – haplotype XIII), which indicates a very recent insertion  
246 into the duplication from both regions.

247 To estimate the genomic diversity in sugarcane haplotypes from both  
248 regions (analyzed together and separately), the shared 8-kb region (duplication)  
249 was used (Supplemental Table 4), and the SNPs were identified. The diversity in  
250 the *HP600* and *CENP-C* genes was analyzed, and one SNP was observed every  
251 43 bases (Region02) and 70 bases (Region01). We searched for SNPs that could  
252 distinguish each region (Supplemental Table 5) in the *HP600* and *CENP-C* genes,  
253 and one SNP was found for every 56 bases (20 SNPs in total). In addition, small  
254 (3-10 bases) and large (30 – 200 bases) insertions were found. These results  
255 revealed a high level of diversity in sugarcane, i.e., a high number of SNPs in each  
256 region, which could be used to generate molecular markers and to improve genetic  
257 maps. In addition, the diversity rate of both regions together could be used as an  
258 indicator of a duplicated gene, i.e., a rate < 20 (Supplemental Table 4).

259

260 ***HP600* and *CENP-C* haplotypes and phylogenetics**

261 Gene haplotypes, i.e., genes with the same coding sequences (CDSs), from  
262 *HP600* and *CENP-C* that have the same coding sequence (i.e., exons) in different  
263 BAC haplotypes were considered the same gene haplotype. In Region01, four  
264 haplotypes of *HP600* were identified. In sorghum, the size of *HP600* is 187 amino  
265 acids (561 base pairs). *HP600* has two different sizes in sugarcane haplotypes of  
266 188 amino acids (564 base pairs (haplotype I/II/VI, haplotype IV/V and haplotype  
267 VII) and 120 amino acids (360 base pairs – haplotype III). *HP600* haplotype III has  
268 a base deletion at position 77, causing a frameshift that results in a premature stop  
269 codon.

270 In Region02, *HP600* exhibited six haplotypes: haplotype VIII, haplotype IX,  
271 haplotype X/XI/XII/XIII/XIV, haplotype XV, and haplotype XVI. *HP600* Haplotype IX  
272 carried an insertion of eight bases in the last exon that caused a frameshift.

273 In *S. bicolor*, *CENP-C* is formed by 14 exons (Talbert et al., 2004) encoding  
274 694 amino acids (2082 base pairs). In sugarcane, the haplotypes from Region01  
275 had 14 exons that give rise to a protein of 708 or 709 amino acids (2124 or 2127  
276 bases). Talbert et al. (2004) described two haplotypes in sugarcane EST clones  
277 (Vettore et al., 2003), *CENP-C1* and *CENP-C2*, which correspond to the  
278 haplotypes I/II and haplotypes IV/V, respectively. In addition to *CENP-C1* and  
279 *CENP-C2*, three other *CENP-C* haplotypes were observed: haplotype III, haplotype  
280 VI, and haplotype VIII.

281 In Region02, the sugarcane duplication of *CENP-C* consisted of the last  
282 seven exons (exons eight to fourteen from *CENP-C* in Region01), and six  
283 haplotypes were found: haplotype VIII, haplotype IX, haplotypes XI/XII/XIII,  
284 haplotype XIV, haplotype XV, and haplotype XVI. The haplotype X BAC sequence  
285 finished before the *CENP-C* gene (Figure 1).

286 To reconstruct a phylogenetic tree for *HP600* and *CENP-C* from both  
287 regions, the orthologs from *O. sativa* and *Zea mays* were searched. The rice  
288 *HP600* and *CENP-C* orthologs, LOC\_Os01g43060 and LOC\_Os01g43050, were  
289 recovered, respectively. Maize has gone through tetraploidization since its  
290 divergence from sorghum approximately 12 million years ago (Woodhouse et al.,  
291 2010). The maize *HP600* ortholog search returned three possible genes with high

292 similarity: GRMZM2G114380 (chromosome 03), GRMZM2G018417 (chromosome  
293 01) and GRMZM2G056377 (chromosome 01). The *CENP-C* maize ortholog search  
294 returned three possible genes with high similarity: GRMZM2G114315  
295 (chromosome 03), GRMZM2G134183 (chromosome 03), and GRMZM2G369014  
296 (chromosome 01).

297         Given the gene organization among the BACs, sorghum and rice revealed  
298 that *HP600* and *CENP-C* were side by side, and the expected orthologs from  
299 maize could be GRMZM2G114380 (*HP600*) and GRMZM2G114315 (*CENP-C*)  
300 because only these two genes are physically side by side. The other maize  
301 orthologs were probably maize paralogs that resulted from specific duplications of  
302 the *Z. mays* genome.

303         Two phylogenetic trees were constructed (Supplemental Figure 5), one for  
304 *HP600* (Supplemental Figure 5, panel A) and the other for *CENP-C* (Supplemental  
305 Figure 5 panel B), using sugarcane *HP600* and *CENP-C* haplotypes from both  
306 regions. The results demonstrated that the haplotypes from Region01 and  
307 Region02 are more similar to themselves than they are to those of sorghum or rice.  
308 Thus, the results also suggest that Region02 contains paralogous genes from  
309 Region01.

310         The divergence times among sugarcane *HP600* haplotypes and sorghum  
311 ranged from 1.5 Mya to 4.5 Mya. For *CENP-C*, the haplotype divergence time rates  
312 were 0.3-0.7 Mya, and the comparison with sorghum indicated 4.2-4.5 Mya for the  
313 highest values. The estimated sugarcane x sorghum divergence time was 5 Mya  
314 (Ming et al., 1998) to 8-9 Mya (Jannoo et al., 2007).

315

### 316 **Chromosome number determination and BAC-FISH**

317 The determination of the range of *CENP-C* and *HP600* loci that are present in the  
318 sugarcane genome was performed using in situ hybridization. First, the number of  
319 chromosomes in sugarcane variety SP80-3280 was defined, but the number of  
320 clear and well-spread metaphases for the variety SP80-3280 was less than 10  
321 (Supplemental Table 6). We expanded the analysis to four more varieties of  
322 sugarcane (SP81-3250, RB835486, IACSP95-3018 and IACSP93-3046) to

323 improve the conclusions (Supplemental Figure 6 – Panel A, B, C, D and E – and  
324 Supplemental Table 6). The most abundant number of chromosomes was  $2n =$   
325 112 (range:  $2n = 98$  to  $2n = 118$  chromosomes). The chromosome number of the  
326 *Saccharum* hybrid cultivar SP80-3280 was found to be  $2n = 112$  (range:  $2n = 108$   
327 to  $2n = 118$  chromosomes - Supplemental Table 6). Vieira et al. (2018) found  $2n =$   
328 112 chromosomes for IACSP93-3046 variety, corroborating with our data. The  $2n =$   
329 112 chromosome number should indicate convergence in the number of  
330 chromosomes in the *Saccharum* hybrid cultivar.

331 As second step, we used two varieties with the best chromosome spreads,  
332 i.e., IACSP93-3046 and IACSP95-3018, for the CMA/DAPI banding patterns  
333 (Supplemental Figure 6 – Panel F, G, H and I). The variety IACSP93-3046  
334 exhibited at least six terminal  $CMA^+/DAPI^-$  bands, one chromosome with  
335  $CMA^+/DAPI^0$  and two chromosomes with adjacent intercalations of  $CMA^+$  and  
336  $DAPI^+$  in the same chromosome (Supplemental Figure 6 – Panel F and G). The  
337 variety IACSP95-3018 revealed seven terminal  $CMA^+/DAPI^-$  bands, and at least  
338 two chromosomes exhibited adjacent  $CMA^+$  and  $DAPI^+$ ; one was in the intercalary  
339 position, and the other was in the terminal position (Supplemental Figure 6 – Panel  
340 H and I). Additionally, the equal number of chromosomes and the divergent  
341 number of bands could indicate different chromosomal arrangements and/or  
342 different numbers of homeologs in each variety.

343 Finally, we performed BAC-FISH in the better metaphases of variety SP80-  
344 3280 using Shy064N22 (haplotype VII) from Region01; 64 metaphases with some  
345 signal of hybridization were obtained, and for the BAC-FISH of Shy048L15  
346 (haplotype XI) from Region02, 69 were obtained. At least six metaphases for each  
347 region were used to determine the number of signals. For BAC Shy064N22  
348 Region01, eight signals could be counted (Figure 3 – Panel A), and for BAC  
349 Shy048L15 in Region02, ten signals could be defined (Figure 3 – Panel B). These  
350 results detail the numbers of haplotypes in sugarcane for Region01 and Region 02.  
351 Moreover, the numbers of BAC haplotypes found in each region are appropriate  
352 considering the BAC-FISH results, suggesting a missing haplotype for each region.

353 The results observed so far suggest differences between the haplotypes,  
354 i.e., different TEs, insertions and even gene insertions/translocations. We used an  
355 identity of 99% to determinate the same BAC haplotype. The possibility of  
356 haplotypes with more than 99% similarity *in vivo* could not be tested with our data,  
357 since it is not possible distinguish a mismatch in sequence assembly from a real  
358 haplotype.

359

### 360 **Expression of *HP600* and *CENP-C* haplotypes**

361 The transcriptomes of the sugarcane variety SP80-3280 from the roots, shoots and  
362 stalks were mapped on *HP600* and *CENP-C* (NCBI SRR7274987), and the set of  
363 transcripts was used for the transcription analyses. All of the haplotypes of *HP600*  
364 from Region01 were covered by the reads, including haplotype III with a premature  
365 stop codon. None of the haplotypes of *HP600* from Region02 were found,  
366 suggesting *HP600* from Region02 is not expressed (Supplemental Figure 3). For  
367 the *CENP-C* gene from Region01, the haplotypes IV/V were found to be  
368 expressed. Furthermore, haplotypes I/II, haplotype VI and haplotype VII were fully  
369 covered by the reads, except for the first three SNPs, but these SNPs were  
370 described in the work of Talbert et al. (2004) under the haplotype CENP-C1,  
371 suggesting that the set of reads did not cover this region. For haplotype III, one  
372 SNP was not found, but nine exclusive SNPs of this haplotype were represented.  
373 Therefore, all haplotypes of *CENP-C* from Region01 were considered to be  
374 expressed.

375 The *CENP-C* haplotypes I/II, III and VI from Region01 have large  
376 retrotransposons in the introns (Figure 2 – black rectangles). Additionally, no  
377 evidence of substantial influence on expression could be found for this gene, which  
378 may indicate the silencing of these LTR retrotransposons, as discussed by Kim  
379 and Ziberman (2014).

380 The mapping of the transcript reads in the *CENP-C* haplotypes from  
381 Region02 revealed evidence of a chimerical gene (Figure 1, dotted rectangle and  
382 Figure 4). The chimeric gene was formed by the first five exons of the sugarcane  
383 orthologous gene of Sobic.003G299500 and the eighth to fourteenth exons of

384 *CENP-C* (Figure 4 – Panel C). RNAseq reads overlapped the region corresponding  
385 to the union of the chimerical gene (position 1253 of the *CENP-C* haplotypes from  
386 Region02 by 38 reads - Figure 4 – Panel F). This result provided robust evidence  
387 for the formation of the chimerical gene and its expression.

388 The sugarcane gene orthologous to Sobic.003G299500 was represented by  
389 BAC BAC267H24 (GenBank KF184671) from the sugarcane hybrid R570 as  
390 published by de Setta et al. (2014) under the name “SHCRBa\_267\_H24\_F\_10”  
391 (Figure 4 – Panel D). This finding indicated that the ancestral genes from sorghum  
392 (orthologs) were retained in the sugarcane genome (Figure 4 – Panel B and D) and  
393 that the chimerical gene was formed by the fusion of a partial duplication of *CENP-*  
394 *C* and the sorghum ortholog gene Sobic.003G299500 (Figure 4 – Panel C).

395 Two chimerical *CENP-C* haplotypes from Region02 were fully mapped with  
396 transcripts, i.e., haplotypes XI/XII/XIII and haplotype XIV. The chimerical *CENP-C*  
397 haplotypes IX and XVI from Region02 were not fully mapped, but exclusive SNPs  
398 from these haplotypes were recovered. The *CENP-C* haplotypes VIII and XV from  
399 Region02 exhibited no exclusive SNPs in the transcriptome, and evidence for the  
400 expression of these two haplotypes remains undefined.

401

#### 402 **How locus number of homeologs influences expression**

403 We searched the SNPs in the BAC sequences and RNAseq reads (i.e., only in the  
404 transcriptome of the sugarcane variety SP80-3280 from the roots, shoots and  
405 stalks – NCBI SRR7274987) and compared the correspondences to the genes  
406 *HP600* and *CENP-C*. For Region01 and Region02, we defined the ploidies as eight  
407 and ten, respectively, based on the BAC-FISH data. The numbers of BAC  
408 haplotypes recovered for Region01 and Region02 were seven and nine,  
409 respectively, which indicated one missing BAC haplotype in each region.

410 The missing BAC haplotypes were determined by searching for SNPs  
411 present only in the transcriptome. For the *HP600* haplotypes from Region01 (Table  
412 1), six SNPs were found in the transcriptome and not in the BAC haplotypes,  
413 including a (GAG)<sup>3</sup> -> (GAG)<sup>2</sup> deletion. For the *CENP-C* gene (Table 2), eight  
414 SNPs were not represented in the genomic haplotypes. The presence of SNPs

415 only in transcript data corroborates the assumption that (at least) one genomic  
416 haplotype was missing in each region.

417 Using the results obtained from the RNAseq mapping of haplotypes, we also  
418 assumed that all haplotypes of the gene *HP600* were expressed in Region01 and  
419 that none were expressed in Region02. For *CENP-C*, all haplotypes from Region01  
420 were considered expressed, and it was not possible to identify how many  
421 haplotypes were expressed in Region02 (chimerical gene); thus, we used only the  
422 nonduplicated portion of *CENP-C* (exons one to seven of the *CENP-C* gene).

423 We formed three assumptions using the previous results: (I) there is a  
424 missing haplotype for each region; (II) all haplotypes of *HP600* from Region01 are  
425 expressed, and there is no expression of *HP600* in Region02; and (III) *CENP-C* is  
426 expressed in both regions, but only in Region01 is it possible to infer that all  
427 haplotypes are expressed. Using these premises, we investigated the possibilities  
428 of one BAC haplotype being expressed at a higher or lower level than the others.  
429 Therefore, if the haplotypes contribute equally to expression, one SNP found in a  
430 BAC should have the same ratio (dosage) for the transcriptome data. Since we  
431 found evidence for a missing haplotype, two tests were performed: (I) we  
432 determined whether the missing BAC haplotype contributed to the dosage of more  
433 common SNPs, and (II) we determined whether the missing BAC haplotype  
434 contributed to the dosage of the variant SNP.

435 For the *HP600* haplotypes from Region01 (Table 1), only the SNPs 10 and 1  
436 had significant p-values for hypotheses (I) and (II), respectively. These results  
437 suggested that the BAC haplotype ratio does not explain the transcriptome ratio.  
438 The transcript frequencies of SNPs 2, 3, and 4 (Table 1) were less than 0.125 (the  
439 minimum expected ratio for 1:7). To explain these frequencies, the dosage of the  
440 SNPs should be higher than a ploidy of eight (i.e., more than twelve), and our data  
441 do not support this possibility. The three variant SNPs came from *HP600* haplotype  
442 III. This finding could be evidence of some differential expression of the gene  
443 haplotypes, which could suggest that haplotype III is expressed at a lower level  
444 than the others for the *HP600* gene.

445 For *CENP-C*, only the nonduplicated portions of the haplotypes from  
446 Region01 were used. At least one hypothesis was accepted for 17 (70%) SNPs  
447 (Table 2). The mean coverage of the SNPs was 64 reads per SNP, which could be  
448 considered a low coverage when an eight-ploidy region (Region01) is being  
449 inspected (Table 2). Moreover, the result suggests that the haplotypes from  
450 Region01 are equally expressed.

451

### 452 **Genetic mapping**

453 For the genetic mapping, 44 SNPs (Supplemental Table 7) were used to develop  
454 molecular markers (Figure 5), and they were used to construct a genetic map. The  
455 SuperMASSA (Serang et al., 2012) software calculates all possible ploidies for a  
456 locus and produces the most probable ploidy. Moreover, it is possible to define a  
457 fixed ploidy for a locus. The first option was used to call the dosages, which were  
458 ultimately used to construct the genetic map (Figure 6), and this map was  
459 compared with the fixed ploidy according to the BAC haplotype results (Figure 5).  
460 In fact, when using a Bayesian approach similar to that from the SuperMASSA,  
461 providing prior information about the ploidy level might improve the dosage  
462 estimates.

463 The markers from introns and exons were drawn along Region01 (Figure 5,  
464 "Location" column), including the duplicated region found in Region02. Among  
465 them, seven exhibited no variant presence in genotyping (Figure 5 – "x" marked),  
466 but five were detected in the RNAseq reads. Two markers (Figure 5 – "+" marked)  
467 were detected only for the "SuperMASSA best ploidy", which was a ploidy higher  
468 than the "SuperMASSA expected ploidy". In addition, two SNP loci were genotyped  
469 two times using different capture primer pairs (SugSNP\_sh061/SugSNP\_sh084  
470 and SugSNP\_sh067/SugSNP\_sh092), and, as expected, at higher ploidy levels (>  
471 12), the dosages of the loci diverge. These results could be explained by intrinsic  
472 problems in molecular biology that occur during the preparation of the samples,  
473 which affects the signal intensity of the Sequenom iPLEX MassARRAY®  
474 (Sequenom Inc., San Diego, CA, USA) data.



475 The SuperMASSA best ploidy was equal to the genomic ploidy for six SNPs  
476 (Figure 5), and the allelic dosage confirmed in four of them. When the ploidy for the  
477 loci was fixed (8 for Region01 and 18 for Region01 and Region02 SNPs), 24 SNPs  
478 had their dosage confirmed by SuperMASSA (Figure 5 – “SuperMASSA expected  
479 ploidy” columns). Notably, the estimation of the ploidy could also be a difficult task  
480 (Garcia et al., 2013), but when the ploidy used was found in BAC-FISH, the  
481 estimated dosage was in agreement with the dosage found in the BACs in 63%  
482 (28) of the SNPs (Figure 5).

483 For the genetic mapping, ten markers were used according to the  
484 SuperMASSA best ploidy results. First, attempts were made to add each marker to  
485 the existing linkage groups published by Balsalobre et al. (2017), but none of the  
486 markers could be linked to the groups. Then, the markers were tested for linkage  
487 among themselves. Two linkage groups could be created (Figure 6 – panel A) with  
488 27.4 cM and 32.7 cM, respectively. The two linkage groups were too large;  
489 therefore, the markers SugSNP\_sh065 and SugSNP\_sh099 were excluded, since  
490 both markers were in the duplicated region (Figure 6 – panel B).

491 Then, attempts were made to add the remaining markers to the groups  
492 again, and the marker SugSNP\_sh005 was inserted into Linkage group 02 (Figure  
493 6 – panel C). The markers that were in the wrong positions according to the  
494 physical map (BACs) were also excluded, and the marker SugSNP\_sh005 was  
495 excluded from Linkage group 01 but remained in Linkage group 02 (Figure 6 –  
496 panel C). Then, an attempt was made to form one linkage group with the remaining  
497 markers by forcing OneMap to place the markers in a single group. Again, the size  
498 of the group was too large (60.3 cM - Figure 6 – panel D). Therefore, the best  
499 representation of the region was two linkage groups, Linkage group 01 with 2.1 cM,  
500 and Linkage group 02 with 0 cM (Figure 6 – panel E).

501

## 502 **DISCUSSION**

503 The genetic, genomic and transcriptome interactions among sugarcane homeologs  
504 remain obscure. Several works have attempted to understand these interactions  
505 (Jannoo et al., 2007; Wang et al., 2010; Garsmeur et al., 2011; Casu et al., 2012;

506 Figueira et al., 2012; Garcia et al., 2013; de Setta et al., 2014; Xue et al., 2014;  
507 Sun and Joyce, 2017; Vilela et al., 2017; Mancini et al., 2018; and others). The  
508 high polyploidy in sugarcane cultivars make the detection of the ploidy of a locus a  
509 challenge (Casu et al., 2012; Garcia et al., 2013; Xue et al., 2014; Sun and Joyce,  
510 2017; and other).

511 The chromosome number of the main Brazilian varieties was determined.  
512 The chromosome number determination showed an equal number of  
513 chromosomes ( $2n = 112$ , range:  $2n = 98-118$ ). The aneuploid nature of sugarcane  
514 hybrid cultivars (D'Hont, 2005; Piperidis et al., 2010) means that they contain  
515 different numbers of homeologous chromosomes. A number of differences in the  
516 CMA/DAPI patterns were found among the different varieties analyzed in this  
517 study, suggesting differences in chromosome content, i.e., differences in  
518 homeologous arrangement. Vieira et al. (2018) analyzed several sugarcane pollen  
519 cells showing metaphase chromosomes not lined up at the plate, lagging  
520 chromosomes and chromosomal bridges, tetrad cells with micronuclei and dyads  
521 with asynchronous behavior. They conclude that the presence of chromatin bridges  
522 indicates the indirect occurrence of chromosomal inversions.

523 For genetic and genomic studies, information about genomic organization is  
524 very important. Here, we report the construction of two new BAC libraries for two  
525 important Brazilian cultivars, SP80-3280 and SP93-3046, with a larger number of  
526 clones and higher sugarcane genome coverage than previously reported (Tomkins  
527 et al., 1999; Le Cunff et al., 2008; Figueira et al., 2012). The number of clones in a  
528 library is directly related to the number of homeologous regions that can be  
529 recovered.

530 The approach of mapping the BES in the *S. bicolor* genome, already  
531 performed for other libraries (Figueira et al., 2012; Kim et al., 2013; Visendi et al.,  
532 2016), revealed high synteny with the *S. bicolor* genome and a large number of  
533 TEs in the sugarcane genome. Kim et al. (2013) showed BES anchorage of  
534 approximately 6.4%, and Figueira et al. (2012) showed anchorage of  
535 approximately 22%. Our data showed 10% BES anchorage in the sorghum  
536 genome for both libraries constructed. These results are more similar to those of

537 Kim et al. (2013), since they used only BES  $\geq$  300 bp, and we used BES  $\geq$  100  
538 bp.

539 The sugarcane genome has been reported to be composed of  
540 approximately 40% TEs (Figueira et al., 2012; Kim et al., 2013; de Setta et al.,  
541 2014). We also found that the average percentage of TEs was 40%, but this value  
542 has a very large variance among the haplotypes, with a minimum of 21% and a  
543 maximum of 65%. Figueira et al. (2012) and De Setta et al. (2014) also revealed  
544 an inflation of the sugarcane genome in comparison with the *S. bicolor* genome.  
545 De Setta et al. (2014) reported a very significant expansion that mainly occurred in  
546 the intergenic and intronic regions and was primarily because of the presence of  
547 TE, and we confirmed this report by comparing our data with data on the *S. bicolor*  
548 genome. Several studies have reported a very significant sugarcane genome  
549 expansion (Jannoo et al., 2007; Wang et al., 2010; Garsmeur et al., 2011; Figueira  
550 et al., 2012; Setta et al., 2014; Vilela et al., 2017, Mancini et al., 2018).

551 A hypothetical gene *HP600* and the *CENP-C* gene were used in this work  
552 as a case study. The function of *HP600* is unknown, but the ortholog of this gene is  
553 present in the genomes of rice (LOC\_Os01g43060), maize (GRMZM2G114380)  
554 and sorghum (Sobic.003G221600). Sobic.003G221600 (ortholog of *HP600*) was  
555 also found in a QTL for Brix (sugar accumulation) that was mapped by Murray et  
556 al. (2008) and based on the sorghum consensus map reported by Mace and  
557 Jordan (2011). The *CENP-C* protein is a kinetochore component (Kato et al., 2013  
558 and Sandmann et al., 2017) located next to *HP600*. Here, we have demonstrated  
559 the existence of paralogous genes for *HP600* and *CENP-C* that are localized in two  
560 different homeologous sugarcane chromosome groups. The BAC haplotypes could  
561 be separated into two sugarcane homeologous groups as follows: Region01  
562 contained the collinearity region between sorghum and sugarcane *HP600* and  
563 *CENP-C* genes, and Region02 contained their paralogs.

564 Region01 is a recurrent case of high gene conservation and collinearity  
565 among sugarcane homeologs and the *S. bicolor* genome as reported by other  
566 authors (Jannoo et al., 2007; Garsmeur et al., 2011; de Setta et al., 2014; Vilela et  
567 al., 2017, Mancini et al., 2018). Region02 contains parts of the genes *HP600* and

568 *CENP-C* (paralogs). No synteny was found between the sugarcane Region02 and  
569 the sorghum genome. In Region02, a third partial gene (ortholog of  
570 Sobic.003G299500) was also found next to *CENP-C*, and transcriptome analysis  
571 revealed the fusion of the *CENP-C* partial exons with the partial exons of the  
572 sugarcane ortholog of Sobic.003G299500 to form a chimerical gene. Region02 is a  
573 scrambled sugarcane sequence that was possibly formed from different  
574 noncollinear ancestral sequences, but the exonic structure of the genes was  
575 retained. The phylogenetic analysis of gene haplotypes from *HP600* and *CENP-C*  
576 provided evidence that the multiple genes found in maize are the result of specific  
577 duplications in the maize taxa, as expected.

578         The nature of sugarcane hybrid cultivars, especially the processes of  
579 polyploidization (Daniels and Roach, 1987; Paterson et al., 2013) and nobilization  
580 (Bremer, 1961), are the main reason for the genomic variability, gene  
581 pseudogenization and increases in new genes (McClintock, 1984). It is possible  
582 that the structure found in Region02 could be a result of the polyploidization and  
583 domestication of sugarcane (Grivet and Arruda, 2002; Cuadrado et al., 2004;  
584 D'Hont, 2005; Piperidis et al., 2010). However, the presence of a set of sugarcane  
585 homeologs with very similar gene structures leads us to speculate that the  
586 occurrence of an ancestral event prior to polyploidization resulted in this structure.

587         Rearrangement events can also be caused by TEs, but they are normally  
588 caused by the formation of a pseudogene (Lai et al., 2004; Ilic et al., 2013). In the  
589 case of Region02, multiple events resulted in this region, but the number and types  
590 (TE, translocations) of events could not be determined with our data.

591         BAC-FISH hybridization was used to indicate the ploidy of each region.  
592 Eight signals were found for Region01 and 10 for Region02. These results are  
593 highly consistent with the BAC haplotype and suggest that at least one BAC  
594 haplotype is missing in each region. Casu et al. (2012), Xue et al. (2014) and Sun  
595 and Joyce (2017) reported different methods to quantify the copy number of  
596 endogenous gene, some of which resulted in odd copy numbers. Sun and Joyce  
597 (2017) reported that the low or odd numbers could be explained by the contribution  
598 of only the *S. spontaneum* or the *S. officinarum* genome. The presence of genes

599 without collinearity among the sugarcane homeologs could also explain the result  
600 as verified for the orthologs Sobic.003G221800 and Sobic.008G134700.

601 The genomic SNP variation in sugarcane coding regions has been  
602 estimated to be one SNP every 50 bp (Cordeiro et al. 2006) and one every 86 bp  
603 (Cardoso-Silva et al. 2014). For the coding Region01 one SNP was found per 70  
604 bases. Feltus et al. (2004) showed that different ratios of SNPs occur across the  
605 genome. When we compared Region01 and Region02 one SNP was found per 12  
606 bases using only the data for one sugarcane variety SP-803280. In light of the  
607 possible existence of at least one more haplotype, this number could be  
608 underestimated.

609 Once established, the polyploidy might now fuel evolution by virtue of its  
610 polyploid-specific advantages. Vegetative propagation can lead to the retention of  
611 genes. Meiosis may or may not play a role in either the origin or maintenance of a  
612 polyploid lineage (Freeling, 2017). Vegetative propagation is widely used to  
613 propagate sugarcane (even for nondomesticated sugarcanes) and could explain  
614 the high variation in sugarcane and the high level of gene retention. However, it is  
615 not the only factor, with sugarcane polyploidization and nobilization also  
616 contributing to these effects.

617 The homologous gene expression in polyploids can be affected in different  
618 ways, i.e., the homologous genes may retain their original function, one or more  
619 copies may be silenced, or the genes may diversify in function or expression  
620 (Ohno, 1970; Lynch and Force, 2000; Hegarty et al., 2006; Buggs et al., 2011). In  
621 complex polyploids, the roles of ploidy and genome composition in possible  
622 changes in gene expression are poorly understood (Shi et al., 2015). Even in  
623 diploid organisms, this task is difficult, since different interactions can affect the  
624 expression of a gene, and not all homologs are guaranteed to contribute to a  
625 function (Birchler et al., 2005). The expression of the *HP600* and *CENP-C*  
626 haplotypes in Region01 could be confirmed. In Region02, the haplotypes of *HP600*  
627 were not found in the transcriptome dataset (Cardoso-Silva et al., 2014; Matiello et  
628 al., 2015), but at least two haplotypes of the gene *CENP-C* were expressed.

629 The gene haplotypes of *HP600* from Region01 exhibited unbalanced  
630 expression; i.e., for some reason, some haplotypes were expressed at greater  
631 levels than others. These findings could mean that apart from the duplication,  
632 *HP600* might be expressed as a single-copy gene wherein only the haplotypes of  
633 the *HP600* in Region01 were expressed. In addition, we could not identify the  
634 mechanisms contributing to the unbalanced expression. Therefore, the transcripts  
635 from different tissues make us speculate that some kind of tissue-specific  
636 expression could be occurring.

637 Numerous molecular mechanisms are involved in the creation of new  
638 genes, such as exon shuffling, retrotransposons and gene duplications (reviewed  
639 in Long et al., 2003). Gene fusions allow the physical coupling of functions, and  
640 their occurrence in the genome increases with the genome size (Snel et al., 2000).  
641 Sandmann et al. (2017) describes the function of the protein KNL2, which uses  
642 *CENPC-k* motifs to bind DNA sequence independently and interacts with the  
643 centromeric transcripts. The *CENPC* motif is characteristic of *CENP-C*. The  
644 *CENPC* motif of the rat *CENP-C* protein can bind directly to a chimeric H3/cenH3  
645 nucleosome *in vitro* suggesting that this motif binds to cenH3 nucleosomes *in vivo*.  
646 Consequently, it is involved directly in cell division (Kato et al., 2013 and  
647 Sandmann et al., 2017). The *CENPC* motifs described by Sandmann et al. (2017),  
648 were compared with those of *CENP-C* genes in *A. thaliana*, *O. sativa*, *Z. mays* and  
649 *S. bicolor* (Supplemental Figure 7). The *CENP-C* haplotypes from Region02  
650 (chimerical gene) have the same *CENPC* motif as that in sorghum. The *CENP-C*  
651 haplotypes from Region01 have one variation in the second residue of the *CENPC*  
652 motif, which is a glycine in sorghum and a valine in *CENP-C* haplotypes from  
653 Region01. This result suggests that the chimerical gene retained the ancestral  
654 residue at this site, whereas a mutation occurred in *CENP-C* haplotypes from  
655 Region01. Therefore, the mutation could have occurred in sorghum and in the  
656 haplotypes from Region02, but this is unlikely. This result suggests that the *CENP-*  
657 *C* haplotypes from Region01 and Region02 are able to bind to cenH3  
658 nucleosomes.

659           The presence of the motif in the *CENP-C* haplotypes from the Region02  
660 proteins could indicate a chimerical protein with a similar function, specific to  
661 sugarcane, that is involved in the organization of centromeric regions. Moreover,  
662 the presence of large LTR retrotransposons in the intronic region of the *CENP-C*  
663 haplotypes in Region01 does not influence the gene expression. Furthermore, two  
664 studies (Saze, et al., 2013 and Wang, et al., 2013) identified the inactivation of the  
665 same gene, IBM2/ANTI-SILENCING 1 (ASI1), which causes gene transcripts with  
666 methylated intronic transposons that terminate within the elements. The complete  
667 mechanisms that control LTR retrotransposon methylation require further  
668 clarification (Kim and Ziberman, 2014).

669           These results have several implications for the integration of transcriptome  
670 data and genomic data. First, for example, a gene such as *HP600* that  
671 demonstrates single-copy behavior in the transcriptome data and the genomic  
672 behavior of a duplicated gene can cause bias in genetic mapping. Second, a  
673 chimerical gene such as the *CENP-C* haplotypes in Region02 can result in different  
674 levels of expression of the duplicated and nonduplicated gene regions in the  
675 transcriptome data. Using the *CENP-C* gene as an example, if the gene expression  
676 quantification probe recovers the nonduplicated portion of the *CENP-C* gene, it will  
677 give an expression level only for the *CENP-C* haplotypes in Region01. In contrast,  
678 this probe quantifies the duplicated region of *CENP-C*, it will result in the  
679 quantification of *CENP-C* from both Region01 and Region02 and thus overestimate  
680 the expression of *CENP-C*. Consequently, analyses of the expression of the gene  
681 for functional studies for evaluating the balance of gene expression will be biased.

682           The SNPs were also used to compare the ploidy found in BACs with the  
683 results of SuperMASSA software (Garcia et al., 2013). SuperMASSA uses  
684 segregation ratios to estimate ploidy, which is not the same as estimating ploidy by  
685 chromosome counting because of the differences in estimation and the real ploidy  
686 visualized. The SNPs present in a duplication were mapped in a linkage group and  
687 demonstrated a high distance between the markers in the linkage map. The size of  
688 a genetic map is a function of the recombination fraction, so two factors influence  
689 the map size: (I) the number of recombinations found between two markers, and

690 (II) genotyping errors. In this case, the mapping of duplicated markers is an error  
691 and is interpreted by OneMap in a recombination fraction, which inflates the map.

692 Two markers classified with a ploidy of 10 and one with a ploidy of 8 formed  
693 the linkage group 02. The ploidy is not a determinant for the OneMap construction  
694 of a linkage group, but the recombination fraction is. In other words, recombination  
695 fractions can still be computed between single-dose markers classified in different  
696 ploidy levels. In fact, most of nulliplex, simplex and duplex individuals will have the  
697 same dosage call using either 8 or 10 as the ploidy level. In addition, the genome  
698 data (BACs and BAC-FISH) demonstrated that all markers had the same ploidy of  
699 eight and that the physical distances among the markers were too small and thus  
700 probably resulted in the lack of recombination. The fact that we obtained two  
701 linkage groups can be explained by the possibility that single-dose markers may be  
702 linked in repulsion, and insufficient information is available to assemble all of the  
703 markers in one group. Trying to calculate the recombination fraction between  
704 markers D1 and D2 (according to the nomenclature of Wu et al., 2002) in diploids  
705 presents the same obstacle.

706 For the first time, we observed the relationship between a linkage map and  
707 the physical map of a region in sugarcane. Indeed, it is a small region to observe  
708 whereas sugarcane has a large genome, and a linkage map is constructed based  
709 on the recombination fraction. However, it was possible to observe what happens  
710 in the genetic map when a duplicated locus was mapped.

711 The combination of divergent genomes within a hybrid can lead to  
712 immediate, profound and highly varied genome modifications, which could include  
713 chromosomal and molecular structural modifications (Shen et al., 2005; Doyle et  
714 al., 2008; Soltis and Soltis, 2009; Jiang et al., 2011) as well as epigenetic changes  
715 (Chen et al., 2010) and global transcriptomic changes (Hegarty et al., 2006; Buggs  
716 et al., 2011). The integration of the genetic, genomic and transcriptomic data was  
717 used to explain the interaction of the two regions in sugarcane. *HP600* is a  
718 hypothetical gene that is next to the *CENP-C* gene, a kinetochore component  
719 responsible for the initiation of nucleosomes. The sugarcane gene haplotypes of  
720 *HP600* in Region01 and the *CENP-C* haplotypes in Region01 were duplicated in



721 another group of homeologous chromosomes. The duplication of the *HP600*  
722 haplotypes in Region01 resulted in a paralog pseudogene in the *HP600* haplotypes  
723 in Region02. The duplication of *CENP-C* in the haplotypes of Region02 resulted in  
724 fusion with another gene, which contained the first five exons of the orthologous  
725 gene Sobic.003G299500 and exons eight to fourteen of *CENP-C*. The region  
726 where this duplication was inserted (Region02) contained at least three more  
727 genes that probably arose due to duplication, which indicates that multiple  
728 duplication events occurred in this region.

729 The *HP600* and *CENP-C* duplication described in this work occurred  
730 sometime after the separation of sugarcane and sorghum and before the  
731 polyploidization of the *Saccharum* genus. This result is supported by the following  
732 information: (I) the molecular clock time, (II) the genes are present in a  
733 homeologous group of chromosomes; and (III) the *CENP-k* motifs of the *CENP-C*  
734 haplotypes in Region02 are more similar to sorghum than to its paralog in  
735 sugarcane. The formation of a chimeric gene and the scrambled Region02  
736 exhibited a specific moment of formation before *Saccharum* polyploidization, which  
737 makes us wonder which genomic event could be the result this formation. TEs  
738 carrying this region could not be found. It is also possible that TEs were inserted in  
739 this region, and the TE sequences were subsequently lost. An event that resulted  
740 in some genome instability could also be a reason. Additionally, multiple events  
741 could also have occurred.

742 The transcripts from SP80-3280 revealed full expression of the haplotypes  
743 of *HP600* in Region01 (in an unbalanced manner) and the lack of expression of the  
744 haplotypes *HP600* in Region02. The expression of the *HP600* haplotypes in  
745 Region01 can be considered a single-copy gene, despite the presence of the  
746 duplication. The *CENP-C* gene can be considered fully expressed, despite the low  
747 coverage of the transcriptome data. The *CENP-C* haplotypes in Region02 have  
748 four haplotypes that are considered expressed.

749 Currently, only markers with low dosages can be used to construct the  
750 genetic map in sugarcane, which is a limitation of the mapping method in  
751 polyploids. We attempted to map a duplicated region, which is a difficult task even

752 for diploid organisms. Again, it is important to observe that we used a sugarcane  
753 variety with asexual reproduction and performed the genetic mapping in artificial  
754 progeny. We have no idea how the progeny genome responded to the cross, since  
755 sugarcane is aneuploid. In addition, the premise that each individual of the progeny  
756 did not miss any chromosome in the cross (aneuploidy) and the ploidy of a locus is  
757 the same in both the parents and all individuals in the progeny could be biologically  
758 untruthful. The genetic mapping demonstrates that there are obstacles that still  
759 need to be overcome in the genetic mapping of complex polyploids.

760 This study sheds light on the influence of the genome arrangement for  
761 transcriptome and genetic map analyses in the sugarcane polyploid genome. The  
762 integration of genomic sequence arrangements, transcription profiles, cytogenetic  
763 organization and the genetic mapping approach might help to elucidate the  
764 behavior of gene expression, the genetic structure and successful sequence  
765 assembly of the sugarcane genome. Such integrated studies will undoubtedly help  
766 to enhance our understanding of complex polyploid genomes including the  
767 sugarcane genome.

768 Particular emphasis should be given to the determination studies of the  
769 ploidy level and of the duplication loci with the intention of better understanding  
770 complex polyploids. Such studies remain the most original and challenging in terms  
771 of understanding the sugarcane genome. From this perspective, this work presents  
772 an integrated approach to elucidate the allelic dynamics in polyploid genomes.

773

## 774 **METHODS**

775

### 776 **Plant material**

777 The sugarcane varieties SP80-3280 and SPIAC93-3046 were collected from  
778 germplasm at the active site located in the Agronomic Institute of Campinas (IAC)  
779 Sugarcane Center in Ribeirão Preto, São Paulo, Brazil. The leaves were collected  
780 on dry ice and stored at -80°C until use.

781

### 782 **BAC library construction and BAC-end analyses**

783 The high-molecular-weight (HMW) DNA was prepared from the leaves as  
784 described by Peterson et al. (2000) with modifications as described by Gonthier et  
785 al. (2010). The HMW DNA was embedded in low melt agarose (Lonza InCert™  
786 Agarose, Lonza Rockland Inc., Rockland, ME, USA) and partially digested with  
787 HindIII (New England Biolabs, Ipswich, MA, USA). Next, two size selection steps  
788 were performed by pulsed field gel electrophoresis (PFGE) with a Bio-Rad CHEF  
789 Mapper system (Bio-Rad Laboratories, Hercules, CA, USA), and the selected DNA  
790 was ligated into the pIndigoBAC-5 HindIII-Cloning Ready vector (Epicenter  
791 Biotechnologies, Madison, WI, USA) as described by Chalhoub et al. (2004). The  
792 insert size was verified by preparing DNA BACs with the NucleoSpin® 96 Plasmid  
793 Core Kit (MACHEREY-NAGEL GmbH & Co., Düren, Germany), according to the kit  
794 instructions, and the DNA was digested by the NotI (New England Biolabs,  
795 Ipswich, MA, USA) restriction enzyme and analyzed by PFGE.

796 For the BES, 384 random BAC DNAs from each library were prepared with  
797 the NucleoSpin® 96 Plasmid Core Kit (MACHEREY-NAGEL GmbH & Co., Düren,  
798 Germany), according to the kit instructions. The sequencing reactions were  
799 performed according to the manufacturer's instructions for the BigDye Terminator  
800 Kit (Applied Biosystems, Foster City, CA, USA). The primers used in the reactions  
801 were T7 Forward (5' TAATACGACTCACTATAGG 3') and M13 Reverse (5'  
802 AACAGCTATGACCATG 3'). The PCR conditions were 95°C for 1 min followed by  
803 90 cycles of 20 sec at 95°C, 20 sec at 50°C and 4 min at 60°C. The samples were  
804 loaded on a 3730xl DNA Analyzer (Applied Biosystems). Sequence trimming was  
805 conducted by processing the traces using the base-calling software PHRED  
806 (Ewing and Green, 1998; Ewing et al., 1998), and reads with phred score < 20  
807 were trimmed. The sequences were compared by using BLASTN in the *S. bicolor*  
808 genome from Phytozome v10.1 (Goodstein et al., 2012). Only clones with forward  
809 and reverse sequence maps in the *S. bicolor* genome, with a maximum distance of  
810 600 kb and with no hits with repetitive elements, were used to anchor the *S. bicolor*  
811 genome.

812

813 **Target gene determination**

814 Transcripts of *S. bicolor*, *Z. mays* and *O. sativa* were obtained from Phytozome  
815 v10.1 (Goodstein et al., 2012). Each transcript was queried against itself, and  
816 orthologous genes that resulted in redundant sequences were eliminated. From the  
817 remaining genes, the gene Sobic.003G221600 (*Sorghum bicolor* v3.1.1 –  
818 Phytozome v. 12) was chosen because it was inserted in a QTL for Brix from a  
819 study by Murray et al. (2008), which identified the QTL in the SB-03 genome (*S.*  
820 *bicolor* v3.1.1 – Phytozome v. 12). The sequence of the gene Sobic.003G221600  
821 was then used as query in the SUCEST-FUN database (<http://sucest-fun.org/> -  
822 Vettore et al., 2003) and the transcriptome obtained by Cardoso-Silva et al. (2014)  
823 to recover sugarcane transcripts. All the transcripts obtained were aligned (MAFFT;  
824 Katoh et al., 2002) to generate phylogenetic trees by the maximum likelihood  
825 method (PhyML 3.0; Guindon and Gascuel, 2003).

826 The sugarcane transcripts were split into exons according to their annotation  
827 in *S. bicolor*, *Z. mays* and *O. sativa*, and exon five was used to design the probe to  
828 screen both BAC libraries (F: 5' ATCTGCTTCTTGGTGTTGCTG 3', R: 5'  
829 GTCAGACACGATAGGTTTGTG 3'). DNA fragments were PCR-amplified from  
830 sugarcane SP80-3280 and SPIAC93-3046 genomic DNA with specific primers  
831 targeting the gene Sobic.003G221600. The PCR amplification conditions were  
832 95°C for 8 min; 30 cycles of 20 sec denaturation at 95°C, 20 sec of annealing at  
833 60°C, and a 40 sec extension at 72°C; and a final 10 min extension at 72°C. The  
834 probes were sequenced before the screening of the BAC library.

835

### 836 **BAC library screening**

837 Both BAC libraries were spotted onto high-density colony filters with the  
838 workstation QPix2 XT (Molecular Devices, Sunnyvale, CA, USA). The BAC clones  
839 were spotted in duplicate using a 7x7 pattern onto 22 x 22 cm Immobilon-Ny+  
840 filters (Molecular Devices). The whole BAC library from the SP80-3280 sugarcane  
841 variety was spotted in four sets of filters, each one with 55 296 clones in duplicate  
842 and the whole BAC library from SPIAC93-3046 sugarcane variety was spotted in  
843 three sets of filters each with 55,296 clones in duplicate. The filters were processed

844 as described by Roselli et al. (2017). Probe radiolabeling and filter hybridization  
845 were performed as described in Gonthier et al. (2010).

846 The SP80-3280 BAC library was used to construct a 3D pool. A total of  
847 110,592 clones were pooled into 12 superpools following the protocol used by  
848 Paux et al. (2008). The positive BAC clones from the SP80-3280 library were  
849 isolated, and one isolated clone was validated by qPCR. The insert size of each  
850 BAC was estimated by using an electrophoretic profile of NotI-digested BAC DNA  
851 fragments and observed by PFGE (CHEF-DRIII system, Bio-Rad) in a 1% agarose  
852 gel in 0.5× TBE buffer under the conditions described in Paiva et al. (2011).

853

### 854 **Sequencing and assembly**

855 Twenty-two positive BAC clones were sequenced in pools of 10 clones. One  
856 microgram of each BAC clone was used to prepare individual tagged libraries with  
857 the GS FLX Titanium Rapid Library Preparation Kit (Roche, Branford, CT, USA).  
858 BAC inserts were sequenced by pyrosequencing with a Roche GS FLX Life  
859 Sciences instrument (Branford, CT, USA) in CNRGV, Toulouse, France.

860 The sequences were trimmed with PHRED, vector plndigoBAC-5  
861 sequences and the *Escherichia coli* str. K12 substr. DH10B complete genome was  
862 masked using CROSS\_MATCH, and the sequences were assembled with PHRAP  
863 (Gordon et al., 1998; Gordon et al., 2001; Gordon, 2003) as described by de Setta  
864 et al. (2014). A BLASTN with the draft genome (Riaño-Pachón and Mattiello, 2017)  
865 was performed. A search was performed in the NCBI databank to find sugarcane  
866 BACs that could possibly have the target gene *HP600*.

867

### 868 **Sequence analysis and gene annotation**

869 All the BACs were aligned to verify the presence of redundant sequences of  
870 homeologs. BAC clones with more than 99% similarity were considered the same  
871 homeolog. BACs that represented the same homeologs were not combined. The  
872 BACs were annotated with the gene prediction programs EUGENE (Foissac et al.,  
873 2008) and Augustus (Keller et al., 2011). The BAC sequences were also searched  
874 for genes with BLASTN and BLASTX against the transcripts of SUCEST-FUN

875 database (<http://sucest-fun.org/>; Vettore et al., 2003), the CDS of *S. bicolor*, *Z.*  
876 *mays* and *O. sativa* from Phytozome v12.0 and the transcripts published by  
877 Cardoso-Silva et al. (2014). The BACs were also subjected to BLASTX against  
878 Poaceae proteins. The candidate genes were manually annotated using *S. bicolor*,  
879 *O. sativa* and *Z. mays* CDS. The sequences with more than 80% similarity and at  
880 least 90% coverage were annotated as genes.

881 Repetitive content in the BAC clone sequences was identified with the web  
882 program LTR\_FINDER (Xu and Wang, 2007). Afterward, the BAC sequences were  
883 tested by CENSOR (Kohany et al., 2006) against Poaceae.

884 The phylogenetic trees were built by the Neighbor-Joining method (Saitou and  
885 Nei, 1987) with nucleic distances calculated with the Jukes-Cantor model (Jukes  
886 and Cantor, 1969) in MEGA 7 software (Kumar et al., 2016). The Kimura 2-  
887 parameter (Kimura, 1980) was used as the distance mode.

888

### 889 **Duplication divergence time**

890 The gene contents of *HP600* and *CENP-C* in the duplication regions were  
891 compared, and the distance “d” for coding regions was determined by Nei-Gojobori  
892 with Jukes-Cantor, available in MEGA 7 software (Kumar et al., 2016). The  
893 divergence times of the sequences shared by the duplicated regions in the BACs  
894 were estimated by  $T = d/2r$ . The duplicated sequences were used to calculate the  
895 pairwise distances (d), and “r” was replaced by the mutation rate of  $6.5 \times 10^{-9}$   
896 mutations per site per year as proposed by Gaut et al. (1996). For the whole  
897 duplication, the distance “d” for noncoding regions was determined with the Kimura  
898 2-parameter model and the mutation rate of  $1.3 \times 10^{-8}$  mutations per site per year,  
899 as described by Ma and Bennetzen (2004).

900 The insertion ages of the LTR retrotransposons were estimated based on  
901 the accumulated number of substitutions between the two LTRs (d) (SanMiguel et  
902 al., 1998), using the mutation rate of  $1.3 \times 10^{-8}$  mutations per site per year, as  
903 described by Ma and Bennetzen (2004).

904

### 905 **Gene expression**

906 The transcriptomes of the sugarcane variety SP80-3280 from the roots, shoots and  
907 stalks were mapped on *HP600* and *CENP-C* (NCBI SRR7274987), and the set of  
908 transcripts was used for the transcription analyses. The reads from the sugarcane  
909 transcriptomes were mapped to the reference genes with the Bowtie2 software  
910 2.2.5 (Langmead and Salzberg, 2012) with default parameters; low-quality reads  
911 and unmapped reads were filtered out (samtools -b -F 4); bam files were sorted  
912 (samtools sort); and only mapped reads to the genes were extracted from the bam  
913 files (samtools fastq) and recorded in a FASTQ format file. A haplotype was  
914 considered to be expressed only when the transcript reads were mapped with  
915 100% similarity. SNPs not found in the dataset were searched in the SP80-3280  
916 transcriptomes from Vettore et al. (2003), Talbert et al. (2004) and Cardoso-Silva  
917 et al. (2014) to verify the SNP presence in transcripts, but they were not used in  
918 the expression analysis.

919 To test whether the haplotypes had the same proportional ratio in the  
920 genome and transcriptome, the transcripts were mapped against one haplotype of  
921 the *HP600* haplotypes in Region01 and *CENP-C* with a 90% similarity, and the  
922 SNPs found in the transcripts were identified and the coverage and raw variant  
923 reads count used to verify the presence of SNPs not found in BACs. An SNP was  
924 considered present in the transcripts if it was represented by at least six  
925 transcriptome reads (Kim et al., 2016).

926 We assumed that one haplotype of each region was missing and tested two  
927 genomic frequencies for comparison with the transcriptome sequences: (1) the  
928 missing haplotype had a higher frequency of the SNP, and (2) the missing  
929 haplotype had a lower frequency of the SNP. When the SNP was not found in the  
930 genomic data, we assumed that only the missing haplotype contained the variant  
931 SNP.

932 The frequency of the genomic data was used to test the transcriptome data  
933 with R Studio (Rstudio team, 2015) and the exact binomial test (*binom.test* -  
934 Clopper and Pearson, 1934, Conover, 1971 and Hollander and Wolfe, 1973). A p-  
935 value  $\geq 0.05$  is equivalent to a 95% confidence interval for considering the  
936 genomic ratio equal to the transcriptome ratio.

937

### 938 **Chromosome number determination and BAC-FISH**

939 The chromosome number determination was performed as described by Guerra  
940 (1983) with root tips 0.5–1.5 cm in length, treated with 5 N HCl for 20 min. The  
941 slides were stained with Giemsa 2% for 15 min. Chromosome number  
942 determination was performed for the varieties SP80-3280, SP81-3250, RB83-5486,  
943 RB92-5345, IACSP95-3018 and IACSP93-3046. CMA/DAPI coloration was  
944 performed by enzymatic digestion as described by Guerra and Souza (2002). The  
945 slides were stained with 10 µg/ml DAPI for 30 min and 10 µg/ml CMA for 1 h.  
946 Afterward, the slides were stained with 1:1 glycerol/McIlvaine buffer and visualized.

947 BAC-FISH was performed using the variety SP803280. For mitotic  
948 chromosome preparations, root tips 0.5–1.5 cm in length were collected and  
949 treated in the dark with p-dichlorobenzene-saturated solution in the dark at room  
950 temperature for 2 h, then fixed in a freshly prepared 3:1 mixture (ethanol: glacial  
951 acetic acid) at 4°C for 24 h and stored at –20°C until use. After being washed in  
952 water, they were digested with the following enzymes: 2% cellulase (w/v) (Serva,  
953 Heidelberg, Baden-Wurtemberg State, Germany), 20% pectinase (v/v) (Sigma,  
954 Munich, Baviera State, Germany) and 1% Macerozyme (w/v) (Sigma) at 37°C for 1  
955 h-2 h (Schwarzacher et al., 1980). The meristems were squashed in a drop of 45%  
956 acetic acid and fixed in liquid nitrogen for 15 min. After air-drying, slides with good  
957 metaphase chromosome spreads were stored at –20°C.

958 The BACs Shy064N22 and Shy048L15, both from the BAC library for the  
959 SP80-3280 variety, were used as probes. The probes were labeled with  
960 digoxigenin-11-dUTP (Roche) by nick translation. Bacterial artificial chromosome-  
961 fluorescence in situ hybridization (BAC-FISH) was performed as described by  
962 Schwarzacher and Heslop-Harrison (2000) with minor modifications. The *C<sub>0</sub>t-100*  
963 fraction of the sugarcane variety SP80-3280 genomic DNA, which was used to  
964 block repetitive sequences, was prepared according to Zwick et al. (1997).  
965 Preparations were counterstained and mounted with 2 µg/ml DAPI in Vectashield  
966 (Vector, Burlingame, CA, USA).



967 The sugarcane metaphase chromosomes were observed and  
968 photographed, depending on the procedure, with transmitted light or  
969 epifluorescence under an Olympus BX61 microscope equipped with the  
970 appropriate filter sets (Olympus, Shinjuku-ku, Tokyo, Japan) and a JAI® CV-M4 +  
971 CL monochromatic digital camera (JAI, Barrington, N.J., USA). Digital images were  
972 imported into Photoshop 7.0 (Adobe, San Jose, Calif., USA) for pseudocoloration  
973 and final processing.

974

### 975 **Genetic map construction**

976 The BAC haplotypes were used to identify 44 sugarcane SNPs in the *HP600* and  
977 *CENP-C* exons. The SNP genotyping method was based on MALDI-TOF analysis  
978 performed on a mass spectrometer platform from Sequenom Inc.® as described by  
979 Garcia et al. (2013). The mapping population consisted of 151 full siblings derived  
980 from a cross between the SP80-3280 (female parent) and RB835486 (male parent)  
981 sugarcane cultivars, and the genetic map was constructed as described by  
982 Balsalobre et al. (2017).

983

### 984 **ACCESSION NUMBERS**

985 Sequence data from this article can be found in the EMBL/GenBank data libraries  
986 under the following accession number(s):

987 BAC sequences: from MH463467 to MH463488.

988 RNAseq subset data: SRR7274987

989

### 990 **SUPPLEMENTAL MATERIAL:**

991 Supplemental Figure 1. BAC-end BLASTN location in Sorghum genome.

992 Supplemental Figure 2. BAC BLASTN against sugarcane genome contigs.

993 Supplemental Figure 3. Phylogenetic and physical duplication representation.

994 Supplemental Figure 4. Evolutionary relationships of the gene Sobic.008G134700.

995 Supplemental Figure 5. Evolutionary relationships of *HP600* and *CENP-C*.

996 Supplemental Figure 6. Mitotic metaphases of the sugarcane varieties.

997 Supplemental Figure 7. *CENP-C* motifs alignments.

998 Supplemental Table 1. BACs assembly and annotation.  
999 Supplemental Table 2. Orthologous genes from Region01.  
1000 Supplemental Table 3. Orthologous genes from Region02.  
1001 Supplemental Table 4. Number of SNPs found in CENP-C and HP600.  
1002 Supplemental Table 5. Number of SNPs found in duplicated region.  
1003 Supplemental Table 6. Chromosome counts.  
1004 Supplemental Table 7. Sequenom iPLEX MassARRAY® primers.

1005

## 1006 **ACKNOWLEDGMENTS**

1007 This study was supported by the São Paulo Research Foundation (FAPESP)  
1008 (2008/52197-4) and Coordination for the Improvement of Higher Education  
1009 Personnel (CAPES, Computational Biology Program). The first author was  
1010 supported by a FAPESP Ph.D. fellowship from FAPESP (2010/50119-6). The third  
1011 and fourth authors were supported by PD fellowships (MM 2014/11482-9 and CC-  
1012 S 2015/16399-5). AP received a research fellowship from the National Council for  
1013 Scientific and Technological Development (CNPq).

1014

## 1015 **AUTHOR CONTRIBUTIONS**

1016 APS, DAS, ERFM, HB, MV, and AAFG designed the study; AB, DAS, HH, JF, MC,  
1017 MCM, MVRC, ND, NR and SV performed the research; CBC-S, DAS, GSP, MV,  
1018 M-AVS and RV contributed new analytical/computational tools; AAFG, AB, APS,  
1019 CBC-S, DAS, GSP, HB, LRP, MCM, MGAL, MS, MV, and SV analyzed the data;  
1020 and DAS, MV and APS wrote the paper. All authors critically read the text and  
1021 approved the manuscript.

1022

## 1023 **REFERENCES**

1024 **Balsalobre, T.W.A., da Silva Pereira, G., Margarido, G.R.A., Gazaffi, R.,**  
1025 **Barreto, F.Z., Anoni, C.O., Cardoso-Silva, C.B., Costa, E.A., Mancini,**  
1026 **M.C., Hoffmann, H.P., de Souza, A.P., Garcia, A.A., and Carneiro, M.S.**  
1027 (2017). GBS-based single dosage markers for linkage and QTL mapping

- 1028 allow gene mining for yield-related traits in sugarcane. *BMC Genomics* **18**:  
1029 72.
- 1030 **Balsalobre, T.W.A., Mancini, M.C., Pereira, G.d.S., Anoni, C.O., Barreto, F.Z.,**  
1031 **Hoffmann, H.P., de Souza, A.P., Garcia, A.A.F., and Carneiro, M.S.**  
1032 (2016). Mixed modeling of yield components and brown rust resistance in  
1033 sugarcane families. *Agron. J.* **108**: 1824-1837.
- 1034 **Birchler, J.A., Riddle, N.C., Auger, D.L., and Veitia, R.A.** (2005). Dosage  
1035 balance in gene regulation: biological implications. *Trends Genet.* **21**: 219-  
1036 226.
- 1037 **Bremer, G.** (1961). Problems in breeding and cytology of sugarcane. *Euphytica*  
1038 **10**: 59–78.
- 1039 **Buggs, R.J., Zhang, L., Miles, N., Tate, J.A., Gao, L., Wei, W., Schnable, P.S.,**  
1040 **Barbazuk, W.B., Soltis, P.S., and Soltis, D.E.** (2011). Transcriptomic  
1041 shock generates evolutionary novelty in a newly formed, natural  
1042 allopolyploid plant. *Curr. Biol.* **21**: 551–556.
- 1043 **Cardoso-Silva, C.B., Costa, E.A., Mancini, M.C., Balsalobre, T.W.A., Canesin,**  
1044 **L.E.C., Pinto, L.R., Carneiro, M.S., Garcia, A.A.F., de Souza, A.P., and**  
1045 **Vicentini, R.** (2014). De novo assembly and transcriptome analysis of  
1046 contrasting sugarcane varieties. *PLOS ONE* **9**: e88462 doi:  
1047 10.1371/journal.pone.0088462.
- 1048 **Casu, R.E., Selivanova, A., and Perroux, J.M.** (2012). High-throughput  
1049 assessment of transgene copy number in sugarcane using real-time  
1050 quantitative PCR. *Plant Cell Rep.* **31**: 167–177.
- 1051 **Chalhoub, B., Belcram, H., and Caboche, M.** (2004). Efficient cloning of plant  
1052 genomes into bacterial artificial chromosome (BAC) libraries with larger and  
1053 more uniform insert size. *Plant Biotechnol. J.* **2**: 181–188.
- 1054 **Chen, F., He, G., He, H., Chen, W., Zhu, X., Liang, M., Chen, L., and Deng, X.W.**  
1055 (2010). Expression analysis of miRNAs and highly-expressed small RNAs in  
1056 two rice subspecies and their reciprocal hybrids. *J. Integr. Plant Biol.* **52**:  
1057 971–980.

- 1058 **Clopper, C.J., and Pearson, E.S.** (1934). The use of confidence or fiducial limits  
1059 illustrated in the case of the binomial. *Biometrika* **26**: 404–413.
- 1060 **Conover, J.W.** (1971) Practical nonparametric statistics. John Wiley & Sons, New  
1061 York, Pp 97–104.
- 1062 **Cordeiro, G.M., Elliott, F., McIntyre, C.L., Casu, R.E., and Henry, R.J.** (2006).  
1063 Characterisation of single nucleotide polymorphisms in sugarcane ESTs.  
1064 *Theor. Appl. Genet.* **113**: 331-343.
- 1065 **Costa, E.A., Anoni, C.O., Mancini, M.C., Santos, F.R.C., Marconi, T.G., Gazaffi,**  
1066 **R., Pastina, M.M., Perecin, D., Mollinari, M., Xavier, M.A., Pinto, L.R.,**  
1067 **Souza, A.P., and Garcia, A.A.F.** (2016). QTL mapping including  
1068 codominant SNP markers with ploidy level information in a sugarcane  
1069 progeny. *Euphytica* **211**: 1–16.
- 1070 **Cuadrado, A., Acevedo, R., Moreno Díaz de la Espina, S., Jouve, N., and De**  
1071 **La Torre, C.** (2004). Genome remodelling in three modern *S. officinarum* × *S.*  
1072 *spontaneum* sugarcane cultivars. *J. Exp. Bot.* **55**: 847-854.
- 1073 **D'Hont, A.** (2005). Unraveling the genome structure of polyploids using FISH and  
1074 GISH; examples of sugarcane and banana. *Cytogenet. Genome Res.* **109**:  
1075 27-33.
- 1076 **D'Hont, A., and Glaszmann, J.C.** (2001). Sugarcane genome analysis with  
1077 molecular markers, a first decade of research Proceedings of the Int Soc.  
1078 Sugarcane Technol. 24, pp 556–559.
- 1079 **D'Hont, A., Ison, D., Alix, K., Roux, C., and Glaszmann, J.C.** (1998).  
1080 Determination of basic chromosome numbers in the genus *Saccharum* by  
1081 physical mapping of ribosomal RNA genes. *Genome* **41**: 221–225.
- 1082 **Daniels, J., and Roach, B.T.** (1987). Taxonomy and evolution. In: Heinz DJ (ed.).  
1083 Sugarcane improvement through breeding, vol. 1. Elsevier, Amsterdam, pp  
1084 7–84.
- 1085 **de Setta, N., Monteiro-Vitorello, C.B., Metcalfe, C.J., Cruz, G.M.Q., Del Bem,**  
1086 **L.E., Vicentini, R., Nogueira, F.T.S., Campos, R.A., Nunes, S.L., Turrini,**  
1087 **P.C.G., Vieira, A.P., Ochoa Cruz, E.A., Corrêa, T.C., Hotta, C.T., de Mello**  
1088 **Varani, A., Vautrin, S., da Trindade, A.S., de Mendonça Vilela, M.,**

- 1089           **Lembke, C.G., Sato, P.M., de Andrade, R.F., Nishiyama, M.Y., Cardoso-**  
1090           **Silva, C.B., Scortecci, K.C., Garcia, A.A., Carneiro, M.S., Kim, C.,**  
1091           **Paterson, A.H., Bergès, H., D’Hont, A., de Souza, A.P., Souza, G.M.,**  
1092           **Vincentz, M., Kitajima, J.P., and Van Sluys, M.A.** (2014). Building the  
1093           Sugarcane genome for biotechnology and identifying evolutionary trends.  
1094           *Genomics* **15**: 540.
- 1095           **Doyle, J.J., Flagel, L.E., Paterson, A.H., Rapp, R.A., Soltis, D.E., Soltis, P.S.,**  
1096           **and Wendel, J.F.** (2008). Evolutionary genetics of genome merger and  
1097           doubling in plants. *Annu. Rev. Genet.* **42**: 443–461.
- 1098           **Ewing, B., and Green, P.** (1998). Base-calling of automated sequencer traces  
1099           using Phred. II. Error probabilities. *Genome Res.* **8**: 186–194.
- 1100           **Ewing, B., Hillier, L., Wendl, M.C., and Green, P.** (1998). Base-calling of  
1101           automated sequencer traces using Phred. I. Accuracy assessment. *Genome*  
1102           *Res.* **8**: 175–185.
- 1103           **Felsenstein, J.** (1985). Confidence limits on phylogenies: an approach using the  
1104           bootstrap. *Evolution* **39**: 783-791.
- 1105           **Feltus, F.A., Wan, J., Schulze, S.R., Estill, J.C., Jiang, N., and Paterson, A.H.**  
1106           (2004). An SNP resource for rice genetics and breeding based on  
1107           subspecies indica and japonica genome alignments. *Genome Res.* **14**:  
1108           1812–1819.
- 1109           **Figueira, T.R., Okura, V., Rodrigues da Silva, F., Jose da Silva, M., Kudrna, D.,**  
1110           **Ammiraju, J.S., Talag, J., Wing, R., and Arruda, P.** (2012). A BAC library  
1111           of the SP80-3280 sugarcane variety (*Saccharum* sp.) and its inferred  
1112           microsynteny with the sorghum genome. *BMC Res. Notes* **5**: 185.
- 1113           **Foissac, S., Gouzy, J., Rombauts, S., Mathé, C., Amselem, J., Sterck, L.,**  
1114           **Veau, de Peer, Y.V., Rouze, P., and Schiex, T.** (2008). Genome  
1115           annotation in plants and fungi: EuGene as a model platform. *Curr.*  
1116           *Bioinform.* **3**: 87–97.
- 1117           **Freeling, M.** (2017). Picking up the ball at the K/Pg boundary: the distribution of  
1118           ancient polyploidies in the plant phylogenetic tree as a spandrel of  
1119           asexuality with occasional sex. *Plant Cell* **29**: 202-206.

- 1120 **Freeling, M., Lyons, E., Pedersen, B., Alam, M., Ming, R., and Lisch, D. (2008).**  
1121 Many or most genes in Arabidopsis transposed after the origin of the order  
1122 Brassicales. *Genome Res.* **18**: 1924–1937.
- 1123 **Garcia, A.A., Mollinari, M., Marconi, T.G., Serang, O.R., Silva, R.R., Vieira,**  
1124 **M.L., Vicentini, R., Costa, E.A., Mancini, M.C., Garcia, M.O., Pastina,**  
1125 **M.M., Gazaffi, R., Martins, E.R., Dahmer, N., Sforça, D.A., Silva, C.B.,**  
1126 **Bundock, P., Henry, R.J., Souza, G.M., van Sluys, M.A., Landell, M.G.,**  
1127 **Carneiro, M.S., Vincentz, M.A., Pinto, L.R., Vencovsky, R., and Souza,**  
1128 **A.P. (2013).** SNP genotyping allows an in-depth characterisation of the  
1129 genome of sugarcane and other complex autopolyploids. *Sci. Rep.* **3**: 3399.
- 1130 **Garsmeur, O., Charron, C., Bocs, S., Jouffe, V., Samain, S., Couloux, A., Droc,**  
1131 **G., Zini, C., Glaszmann, J.C., Van Sluys, M.A., and D’Hont, A. (2011).**  
1132 High homologous gene conservation despite extreme autopolyploid  
1133 redundancy in sugarcane. *New Phytol.* **189**: 629-642.
- 1134 **Gaut, B.S., and Doebley, J.F. (1997).** DNA sequence evidence for the segmental  
1135 allotetraploid origin of maize. *Proc. Natl Acad. Sci. U.S.A.* **94**: 6809–6814.
- 1136 **Gaut, B.S., Morton, B.R., McCaig, B.C., and Clegg, M.T. (1996).** Substitution  
1137 rate comparisons between grasses and palms: synonymous rate differences  
1138 at the nuclear gene *Adh* parallel rate differences at the plastid gene *rbcl*.  
1139 *Proc. Natl Acad. Sci. U.S.A.* **93**: 10274-10279.
- 1140 **Gonthier, L., Bellec, A., Blassiau, C., Prat, E., Helmstetter, N., Rambaud, C.,**  
1141 **Huss, B., Hendriks, T., Bergès, H., and Quillet, M.C. (2010).** Construction  
1142 and characterization of two BAC libraries representing a deep-coverage of  
1143 the genome of chicory. (*Cichorium intybus* L., Asteraceae). *BMC Res. Notes*  
1144 **3**: 225.
- 1145 **Goodstein, D.M., Shu, S., Howson, R., Neupane, R., Hayes, R.D., Fazo, J.,**  
1146 **Mitros, T., Dirks, W., Hellsten, U., Putnam, N., and Rokhsar, D.S. (2012).**  
1147 *Phytozome*: a comparative platform for green plant genomics. *Nucleic Acids*  
1148 *Res.* **40**: D1178–D1186.
- 1149 **Gopalakrishnan, S., Sullivan, B.A., Trazzi, S., Della Valle, G., and Robertson,**  
1150 **K.D. (2009).** DNMT3B interacts with constitutive centromere protein *CENP-*

- 1151 C to modulate DNA methylation and the histone code at centromeric  
1152 regions. *Hum. Mol. Genet.* **18**: 3178–3193.
- 1153 **Gordon, D.** (2003), 11.2.1-11.2.43. Viewing and editing assembled sequences  
1154 using Consed. *Curr. Protoc. Bioinformatics*. In: Baxevanis AD, Davison DB  
1155 (eds). John Wiley & Co., New York, pp 11.2.1-11.2.43.
- 1156 **Gordon, D., Abajian, C., and Green, P.** (1998). Consed: a graphical tool for  
1157 sequence finishing. *Genome Res.* **8**: 195-202.
- 1158 **Gordon, D., Desmarais, C., and Green, P.** (2001). Automated finishing with  
1159 Autofinish. *Genome Res.* **11**: 614-625.
- 1160 **Grivet, L., and Arruda, P.** (2002). Sugarcane genomics: depicting the complex  
1161 genome of an important tropical crop. *Curr. Opin. Plant Biol.* **5**: 122-127.
- 1162 **Guerra, M.** (1983). O uso de Giemsa em citogenética vegetal – comparação entre  
1163 a coloração simples e o bandamento. *Cienc. Cult.* **35**: 190-193.
- 1164 **Guerra, M., and Souza, M.J.** (2002) Como observar cromossomos: um guia de  
1165 técnicas em citogenética vegetal, animal e humana. FUNPEC, Ribeirão  
1166 Preto, SP, p 131.
- 1167 **Guindon, S., and Gascuel, O.** (2003). A simple, fast, and accurate algorithm to  
1168 estimate large phylogenies by maximum likelihood. *Syst. Biol.* **52**: 696-704.
- 1169 **Hegarty, M.J., Barker, G.L., Wilson, I.D., Abbott, R.J., Edwards, K.J., and**  
1170 **Hiscock, S.J.** (2006). Transcriptome shock after interspecific hybridization  
1171 in senecio is ameliorated by genome duplication. *Curr. Biol.* **16**: 1652–1659.
- 1172 **Hollander, M., and Wolfe, D.A.** (1973) Nonparametric statistical methods. John  
1173 Wiley & Sons, New York, pp 15–22.
- 1174 **Ilic, K., SanMiguel, P.J., and Bennetzen, J.L.** (2003). A complex history of  
1175 rearrangement in an orthologous region of the maize, sorghum, and rice  
1176 genomes. *Proc. Natl Acad. Sci. U.S.A.* **100**: 12265-12270.
- 1177 **Irvine, J.E.** (1999). *Saccharum* species as horticultural classes. *TAG Theoretical*  
1178 *and Applied Genetics* **98**: 186–194.
- 1179 **Jannoo, N., Grivet, L., Chantret, N., Garsmeur, O., Glaszmann, J.C., Arruda,**  
1180 **P., and D’Hont, A.** (2007). Orthologous comparison in a gene-rich region

- 1181 among grasses reveals stability in the sugarcane polyploid genome. *Plant J.*  
1182 **50**: 574-585.
- 1183 **Jiang, B., Lou, Q., Wu, Z., Zhang, W., Wang, D., Mbira, K.G., Weng, Y., and**  
1184 **Chen, J.** (2011). Retrotransposon- and microsatellite sequence-associated  
1185 genomic changes in early generations of a newly synthesized allotetraploid  
1186 *cucumis* × *hytivus* Chen & Kirkbride. *Plant Mol. Biol.* **77**: 225–233.
- 1187 **Jukes, T.H., and Cantor, C.R.** (1969) Evolution of protein molecules. Academic  
1188 Press, New York, pp 21–132.
- 1189 **Kato, H., Jiang, J., Zhou, B.R., Rozendaal, M., Feng, H., Ghirlando, R., Xiao,**  
1190 **T.S., Straight, A.F., and Bai, Y.** (2013). A conserved mechanism for  
1191 centromeric nucleosome recognition by centromere protein *CENP-C*.  
1192 *Science* **340**: 1110-1113.
- 1193 **Katoh, K., Misawa, K., Kuma, K., and Miyata, T.** (2002). MAFFT: a novel method  
1194 for rapid multiple sequence alignment based on fast Fourier transform.  
1195 *Nucleic Acids Res.* **30**: 3059-3066.
- 1196 **Keller, O., Kollmar, M., Stanke, M., and Waack, S.** (2011). A novel hybrid gene  
1197 prediction method employing protein multiple sequence alignments.  
1198 *Bioinformatics* **27**: 757-763.
- 1199 **Kellogg, E.A.** (2001). Evolutionary history of the grasses. *Plant Physiol.* **125**:  
1200 1198–1205.
- 1201 **Kim, C., Guo, H., Kong, W., Chandnani, R., Shuang, L.S., and Paterson, A.H.**  
1202 (2016). Application of genotyping by sequencing technology to a variety of  
1203 crop breeding programs. *Plant Sci.* **242**: 14-22.
- 1204 **Kim, C., Lee, T.H., Compton, R.O., Robertson, J.S., Pierce, G.J., and Paterson,**  
1205 **A.H.** (2013). A genome-wide BAC end-sequence survey of sugarcane  
1206 elucidates genome composition, and identifies BACs covering much of the  
1207 euchromatin. *Plant Mol. Biol.* **81**: 139–147.
- 1208 **Kim, M. Y., and Zilberman, D.** (2014). DNA methylation as a system of plant  
1209 genomic immunity. *Trends Plant Sci.* **19**: 320-326.



- 1210 **Kimura, M.** (1980). A simple method for estimating evolutionary rates of base  
1211 substitutions through comparative studies of nucleotide sequences. *J. Mol.*  
1212 *Evol.* **16**: 111-120.
- 1213 **Kohany, O., Gentles, A.J., Hankus, L., and Jurka, J.** (2006). Annotation,  
1214 submission and screening of repetitive elements in Repbase:  
1215 RepbaseSubmitter and Censor. *BMC Bioinform.* **7**: 474.
- 1216 **Kumar, S., Stecher, G., and Tamura, K.** (2016). MEGA7: Molecular Evolutionary  
1217 Genetics Analysis version 7.0 for bigger datasets. *Mol. Biol. Evol.* **33**: 1870-  
1218 1874.
- 1219 **Lai, J., Ma, J., Swigonová, Z., Ramakrishna, W., Linton, E., Llaca, V.,**  
1220 **Tanyolac, B., Park, Y.J., Jeong, O.Y., Bennetzen, J.L., and Messing, J.**  
1221 (2004). Gene loss and movement in the maize genome. *Genome Res.* **14**:  
1222 1924-1931.
- 1223 **Landell, M.G.A., Campana, M.P., Figueiredo, P., Vasconcelos ACM, Xavier**  
1224 **MA, Bidoia MAP, Prado H, Silva MA, and Miranda LLD** (2005)  
1225 Variedades de cana-de-açúcar pad'ra o centro sul do Brasil. Technical  
1226 Bulletin IAC **197**: 33.
- 1227 **Langmead, B., and Salzberg, S.L.** (2012). Fast gapped-read alignment with  
1228 Bowtie 2. *Nat. Methods* **9**: 357-359.
- 1229 **Le Cunff, L., Garsmeur, O., Raboin, L.M., Pauquet, J., Telismart, H., Selvi, A.,**  
1230 **Grivet, L., Philippe, R., Begum, D., Deu, M., Costet, L., Wing, R.,**  
1231 **Glaszmann, J.C., and D'Hont, A.** (2008). Diploid/polyploid syntenic shuttle  
1232 mapping and haplotype-specific chromosome walking toward a rust  
1233 resistance gene (Bru1) in highly polyploid sugarcane (2n approximately 12x  
1234 approximately 115). *Genetics* **180**: 649-660.
- 1235 **Long, M., Betrán, E., Thornton, K., and Wang, W.** (2003). The origin of new  
1236 genes: glimpses from the young and old. *Nat. Rev. Genet.* **4**: 865–875.
- 1237 **Lynch, M., and Force, A.G.** (2000). The origin of interspecific genomic  
1238 incompatibility via gene duplication. *Am. Nat.* **156**: 590–605.
- 1239 **Ma, J., and Bennetzen, J.L.** (2004). Rapid recent growth and divergence of rice  
1240 nuclear genomes. *Proc. Natl Acad. Sci. U.S.A.* **101**: 12404–12410.

- 1241 **Mace, E.S., and Jordan, D.R.** (2011). Integrating sorghum whole genome  
1242 sequence information with a compendium of sorghum QTL studies reveals  
1243 uneven distribution of QTL and of gene-rich regions with significant  
1244 implications for crop improvement. *Theor. Appl. Genet.* **123**: 169–191.
- 1245 **Mancini, M.C., Cardoso-Silva, C.B., Sforça, D.A., and Souza, A.P.** (2018).  
1246 “Targeted sequencing by gene synteny,” a new strategy for polyploid  
1247 species: sequencing and physical structure of a complex sugarcane region.  
1248 *Front. Plant Sci.* **9**: 397.
- 1249 **Mattiello, L., Riaño-Pachón, D.M., Martins, M.C., da Cruz, L.P., Bassi, D.,**  
1250 **Marchiori, P.E., Ribeiro, R.V., Labate, M.T., Labate, C.A., and Menossi,**  
1251 **M.** (2015). Physiological and transcriptional analyses of developmental  
1252 stages along sugarcane leaf. *BMC Plant Biol.* **15**: 300.
- 1253 **McClintock, B.** (1984). The significance of responses of the genome to challenge.  
1254 *Science* **226**: 792–801.
- 1255 **Ming, R., Liu, S.C., Lin, Y.R., da Silva, J., Wilson, W., Braga, D., van Deynze,**  
1256 **A., Wenslaff, T.F., Wu, K.K., Moore, P.H., Burnquist, W., Sorrells, M.E.,**  
1257 **Irvine, J.E., and Paterson, A.H.** (1998). Detailed alignment of saccharum  
1258 and sorghum chromosomes: comparative organization of closely related  
1259 diploid and polyploid genomes. *Genetics* **150**: 1663–1682.
- 1260 **Mosccone, E.A., Matzke, M.A., and Matzke, A.J.M.** (1996). The use of combined  
1261 FISH/GISH in conjunction with DAPI counterstaining to identify  
1262 chromosomes containing transgene inserts in amphidiploid tobacco.  
1263 *Chromosoma* **105**: 231-236.
- 1264 **Murray, S.C., Sharma, A., Rooney, W.L., Klein, P.E., Mullet, J.E., Mitchell, S.E.,**  
1265 **and Kresovich, S.** (2008). Genetic improvement of Sorghum as a biofuel  
1266 feedstock: I. QTL for stem sugar and grain nonstructural carbohydrates.  
1267 *Crop Sci.* **48**: 2165-2179.
- 1268 **Nishiyama Jr, M. Y., Ferreira, S. S., Tang, P. Z., Becker, S., Poertner-Taliana,**  
1269 **A., and Souza, G. M.** (2014). Full-length enriched cDNA libraries and  
1270 ORFeome analysis of sugarcane hybrid and ancestor genotypes. *PloS one,*  
1271 **9**: e107351.

- 1272 **Ohno, S.** (1970) Evolution by gene duplication. Springer-Verlag, New York.
- 1273 **Paiva, J.A.P., Prat, E., Vautrin, S., Santos, M.D., San-Clemente, H.,**  
1274 **Brommonschenkel, S., Fonseca, P.G., Grattapaglia, D., Song, X.,**  
1275 **Ammiraju, J.S., Kudrna, D., Wing, R.A., Freitas, A.T., Bergès, H., and**  
1276 **Grima-Pettenati, J.** (2011). Advancing Eucalyptus genomics: identification  
1277 and sequencing of lignin biosynthesis genes from deep-coverage BAC  
1278 libraries. *BMC Genomics* **12**: 137. doi: 10.1186/1471-2164-12-137.
- 1279 **Paterson, A.H., Moore, P.H., and Tew, T.L.** (2013). The gene pool of saccharum  
1280 species and their improvement. In: Paterson A (ed.). *Genomics of the*  
1281 *Saccharinae*, Springer, Berlin, pp 43–72.
- 1282 **Paux, E., Sourdille, P., Salse, J., Saintenac, C., Choulet, F., Leroy, P., Korol,**  
1283 **A., Michalak, M., Kianian, S., Spielmeier, W., Lagudah, E., Somers, D.,**  
1284 **Kilian, A., Alaux, M., Vautrin, S., Bergès, H., Eversole, K., Appels, R.,**  
1285 **Safar, J., Simkova, H., Dolezel, J., Bernard, M., and Feuillet, C.** (2008). A  
1286 physical map of the 1-gigabase bread wheat chromosome 3b. *Science* **322**:  
1287 101–104. doi: 10.1126/science.1161847.
- 1288 **Peterson, D.G., Tomkins, J.P., Frisch, D.A., Wing, R.A., and Paterson, A.H.**  
1289 (2000). Construction of plant bacterial artificial chromosome (BAC) libraries:  
1290 an illustrated guide. *J. Agric. Genomics* **5**: 1–100.
- 1291 **Piperidis, G., and D’Hont, A.** (2001). Chromosome composition analysis of  
1292 various *Saccharum* interspecific hybrids by genomic in situ hybridization  
1293 (GISH) *Proceedings of the Int Soc. Sugcane Technol.* 24, pp 565–566.
- 1294 **Piperidis, G., Piperidis, N., and D’Hont, A.** (2010). Molecular cytogenetic  
1295 investigation of chromosome composition and transmission in sugarcane.  
1296 *Mol. Genet. Genomics* **284**: 65-73.
- 1297 **Ramsey, J., and Schemske, D.W.** (2002). Neopolyploidy in flowering plants.  
1298 *Annu. Rev. Ecol. Syst.* **33**: 589-639.
- 1299 **Riaño-Pachón, D.M., and Mattiello, L.** (2017). Draft genome sequencing of the  
1300 sugarcane hybrid SP80-3280. *F1000Res* **6**: 861.
- 1301 **Roselli, S., Olry, A., Vautrin, S., Coriton, O., Ritchie, D., Galati, G., Navrot, N.,**  
1302 **Krieger, C., Vialart, G., Bergès, H., Bourgaud, F., and Hehn, A.** (2017). A

- 1303 bacterial artificial chromosome (BAC) genomic approach reveals partial  
1304 clustering of the furanocoumarin pathway genes in parsnip. *Plant J.* **89**:  
1305 1119-1132. doi: 10.1111/tpj.13450.
- 1306 **RStudio Team** (2015). RStudio: integrated development for R. RStudio, Inc.,  
1307 Boston, MA. <http://www.rstudio.com/>.
- 1308 **Saitou, N., and Nei, M.** (1987). The neighbor-joining method: a new method for  
1309 reconstructing phylogenetic trees. *Mol. Biol. Evol.* **4**: 406-425.
- 1310 **Sandmann, M., Talbert, P., Demidov, D., Kuhlmann, M., Rutten, T., Conrad, U.,  
1311 and Lermontova, I.** (2017). Targeting of arabidopsis KNL2 to centromeres  
1312 depends on the conserved CENPC-k motif in Its C terminus. *Plant Cell* **29**:  
1313 144–155. doi: 10.1105/tpc.16.00720.
- 1314 **SanMiguel, P., Gaut, B.S., Tikhonov, A., Nakajima, Y., and Bennetzen, J.L.**  
1315 (1998). The paleontology of intergene retrotransposons of maize. *Nat.*  
1316 *Genet.* **20**: 43-45.
- 1317 **Saze, H., Kitayama, J., Takashima, K., Miura, S., Harukawa, Y., Ito, T., and  
1318 Kakutani, T.** (2013). Mechanism for full-length RNA processing of  
1319 Arabidopsis genes containing intragenic heterochromatin. *Nat. Commun.* **4**:  
1320 2301.
- 1321 **Schwarzacher, T., Ambros, P., and Schweizer, D.** (1980). Application of Giemsa  
1322 banding to orchid karyotype analysis. *Plant Syst. Evol.* **134**: 293-297.
- 1323 **Schwarzacher, T., and Heslop-Harrison, P.** (2000). Practical in situ hybridization.  
1324 BIOS Scientific.
- 1325 **Serang, O., Mollinari, M., Garcia, A.A.F.** (2012) Efficient exact maximum a  
1326 posteriori computation for bayesian SNP genotyping in polyploids. *PLoS*  
1327 *One* **7**: e30906.
- 1328 **Shen, Y., Lin, X.Y., Shan, X.H., Lin, C.J., Han, F.P., Pang, J.S., and Liu, B.**  
1329 (2005). Genomic rearrangement in endogenous long terminal repeat  
1330 retrotransposons of rice lines introgressed by wild rice (*Zizania latifolia*  
1331 Griseb.). *J. Integr. Plant Biol.* **47**: 998–1008.
- 1332 **Shi, X., Zhang, C., Ko, D.K., and Chen, Z.J.** (2015). Genome-wide dosage-  
1333 dependent and -independent regulation contributes to gene expression and

- 1334 evolutionary novelty in plant polyploids. *Mol. Biol. Evol.* **32**: 2351–2366 doi:  
1335 10.1093/molbev/msv116.
- 1336 **Snel, B., Bork, P., and Huynen, M.** (2000). Genome evolution. Gene fusion  
1337 versus gene fission. *Trends Genet.* **16**: 9–11.
- 1338 **Soltis, P.S., and Soltis, D.E.** (2009). The role of hybridization in plant speciation.  
1339 *Annu. Rev. Plant Biol.* **60**: 561–588.
- 1340 **Souza, G.M., Berges, H., Bocs, S., Casu, R., D'Hont, A., Ferreira, J.E., Henry,**  
1341 **R., Ming, R., Potier, B., Sluys, M.A. van, Vincentz, M., and Paterson,**  
1342 **A.H.** (2011). The sugarcane genome challenge: strategies for sequencing a  
1343 highly complex genome. *Tropical Plant Biol.* **4**: 145–156.
- 1344 **Sun, Y., and Joyce, P.A.** (2017). Application of droplet digital PCR to determine  
1345 copy number of endogenous genes and transgenes in sugarcane. *Plant Cell*  
1346 *Rep.* **36**: 1775-1783.
- 1347 **Swigonová, Z., Lai, J., Ma, J., Ramakrishna, W., Llaca, V., Bennetzen, J.L.,**  
1348 **and Messing, J.** (2004). Close split of sorghum and maize genome  
1349 progenitors. *Genome Res.* **14**: 1916–1923.
- 1350 **Talbert, P.B., Bryson, T.D., and Henikoff, S.** (2004). Adaptive evolution of  
1351 centromere proteins in plants and animals. *J. Biol.* **3**: 18.
- 1352 **Tomkins, J.P., Yu, Y., Miller-Smith, H., Frisch, D.A., Woo, S.S., and Wing, R.A.**  
1353 (1999). A bacterial artificial chromosome library for sugarcane. *Theor. Appl.*  
1354 *Genet.* **99**: 419-424. doi: 10.1007/s001220051252.
- 1355 **Vettore, A.L., da Silva, F.R., Kemper, E.L., Souza, G.M., da Silva, A.M., Ferro,**  
1356 **M.I., Henrique-Silva, F., Giglioti, E.A., Lemos, M.V., Coutinho, L.L.,**  
1357 **Nobrega, M.P., Carrer, H., França, S.C., Bacci Júnior, M., Goldman,**  
1358 **M.H., Gomes, S.L., Nunes, L.R., Camargo, L.E., Siqueira, W.J., Van**  
1359 **Sluys, M.A., Thiemann, O.H., Kuramae, E.E., Santelli, R.V., Marino, C.L.,**  
1360 **Targon, M.L., Ferro, J.A., Silveira, H.C., Marini, D.C., Lemos, E.G.,**  
1361 **Monteiro-Vitorello, C.B., Tambor, J.H., Carraro, D.M., Roberto, P.G.,**  
1362 **Martins, V.G., Goldman, G.H., de Oliveira, R.C., Truffi, D., Colombo,**  
1363 **C.A., Rossi, M., de Araujo, P.G., Sculaccio, S.A., Angella, A., Lima,**  
1364 **M.M., de Rosa Júnior, V.E., Siviero, F., Coscrato, V.E., Machado, M.A.,**

- 1365 **Grivet, L., Di Mauro, S.M., Nobrega, F.G., Menck, C.F., Braga, M.D.,**  
1366 **Telles, G.P., Cara, F.A., Pedrosa, G., Meidanis, J., and Arruda, P. (2003).**  
1367 Analysis and functional annotation of an expressed sequence tag collection  
1368 for tropical crop sugarcane. *Genome Res.* **13**: 2725–2735.
- 1369 **Vieira, M.L.C., Almeida, C.B., Oliveira, C.A., Tacuatiá, L.O., Munhoz, C.F.,**  
1370 **Cauz-Santos, L.A., Pinto, L.R., Monteiro-Vitorello, C.B., Xavier, M.A.,**  
1371 **and Forni-Martins, E.R. (2018).** Revisiting meiosis in sugarcane:  
1372 chromosomal irregularities and the prevalence of bivalent configurations.  
1373 *Front. Gen.* **9**: 213.
- 1374 **Vilela, M.M., Del Bem, L.E., Van Sluys, M.A., de Setta, N., Kitajima, J.P., Cruz,**  
1375 **G.M.Q., Sforça, D.A., de Souza, A.P., Ferreira, P.C.G., Grativol, C.,**  
1376 **Cardoso-Silva, C.B., Vicentini, R., and Vincentz, M. (2017).** Analysis of  
1377 three sugarcane homo/homeologous regions suggests independent  
1378 polyploidization events of *Saccharum officinarum* and *Saccharum*  
1379 *spontaneum*. *Genome Biol. Evol.* **9**: 266–278.
- 1380 **Visendi, P., Berkman, P.J., Hayashi, S., Golicz, A.A., Bayer, P.E., Ruperao, P.,**  
1381 **Hurgobin, B., Montenegro, J., Chan, C.K., Staňková, H., Batley, J.,**  
1382 **Šimková, H., Doležel, J., and Edwards, D. (2016).** An efficient approach to  
1383 BAC based assembly of complex genomes. *Plant Methods* **12**: 2-2. doi:  
1384 10.1186/s13007-016-0107-9.
- 1385 **Wang, J., Roe, B., Macmil, S., Yu, Q., Murray, J.E., Tang, H., Chen, C., Najar,**  
1386 **F., Wiley, G., Bowers, J., Van Sluys, M.A., Rokhsar, D.S., Hudson, M.E.,**  
1387 **Moose, S.P., Paterson, A.H., and Ming, R. (2010).** Microcollinearity  
1388 between autopolyploid sugarcane and diploid sorghum genomes. *BMC*  
1389 *Genomics* **11**: 261.
- 1390 **Wang, X., Duan, C.G., Tang, K., Wang, B., Zhang, H., Lei, M., Lu, K.,**  
1391 **Mangrauthia, S.K., Wang, P., Zhu, G., Zhao, Y., and Zhu, J.K. (2013).**  
1392 RNA-binding protein regulates plant DNA methylation by controlling mRNA  
1393 processing at the intronic heterochromatin-containing gene IBM1. *Proc.*  
1394 *Natl. Acad. Sci. U.S.A.* **110**: 15467-15472.

- 1395 **Woodhouse, M.R., Schnable, J.C., Pedersen, B.S., Lyons, E., Lisch, D.,**  
1396 **Subramaniam, S., and Freeling, M.** (2010). Following tetraploidy in maize,  
1397 a short deletion mechanism removed genes preferentially from one of the  
1398 two homologs. *PLoS Biol.* **8**: e1000409.
- 1399 **Wu, R., Ma, C.X., Painter, I., and Zeng, Z.B.** (2002). Simultaneous maximum  
1400 likelihood estimation of linkage and linkage phases in outcrossing species.  
1401 *Theor. Popul. Biol.* **61**: 349–363.
- 1402 **Xu, Z., and Wang, H.** (2007). LTR\_FINDER: an efficient tool for the prediction of  
1403 full-length LTR retrotransposons. *Nucleic Acids Res.* **35**: W265–W268 doi:  
1404 10.1093/nar/gkm286.
- 1405 **Xue, B.T., Guo, J.L., Que, Y.X., Fu, Z.W., Wu, L.G., and Xu, L.P.** (2014).  
1406 Selection of suitable endogenous reference genes for relative copy number  
1407 detection in sugarcane. *Int. J. Mol. Sci.* **15**: 8846–8862.
- 1408 **Zwick, M.S., Hanson, R.E., Islam-Faridi, M.N., Stelly, D.M., Wing, R.A., Price,**  
1409 **H.J., and McKnight, T.D.** (1997). A rapid procedure for the isolation of C0t-  
1410 1 DNA from plants. *Genome* **40**: 138–142.
- 1411

1412 **FIGURE LEGENDS**

1413 **Figure 1. Schematic representation of the sugarcane BAC haplotypes from**  
1414 **Region01 and Region02.** Squares of the same color represent sugarcane genes  
1415 orthologous to *Sorghum bicolor* genes. Dotted lines connect the homologous  
1416 genes in sugarcane at different positions. In sugarcane Region02, the *CENP-C*  
1417 haplotypes in Region02 are represented by two squares (blue and pink), where  
1418 each square represents a partial gene fusion. The dark gray strip represents the  
1419 shared region from Region01 and Region02 (duplication). The genes in light gray  
1420 (from *S. bicolor*) are not found in the sugarcane BACs. The representation is not to  
1421 scale. The orientation of transcription is indicated by the direction of the arrow at  
1422 the end of each gene.

1423 **Figure 2. Representation of each sugarcane BAC from Region01 and**  
1424 **Region02.** Arrows and rectangles of the same color represent the homologous  
1425 genes in sugarcane. Black rectangles represent repeat regions. Yellow lines  
1426 represent gaps. Similar regions are represented by a gray shadow connecting the  
1427 BACs. The orientation of transcription is indicated by the direction of the arrow at  
1428 the end of each gene. Scale representation.

1429 **Figure 3. FISH hybridization of the sugarcane BACs. Panel (A):** BAC  
1430 Shy065N22 hybridization in sugarcane variety SP-803280 mitosis showing eight  
1431 signals for Region01. **Panel (B):** BAC Shy048L15 hybridization in sugarcane  
1432 variety SP-803280 mitosis showing ten signals for Region02.

1433 **Figure 4. Fusion gene formation of *CENP-C* and Sobic003G299500. Panel (A):**  
1434 *Sorghum CENP-C* and Sobic003G299500 genome location. **Panel (B):** Sugarcane  
1435 genomic *CENP-C* haplotypes in Region01 (all expressed). **Panel (C):** Partially  
1436 duplicated sugarcane paralogs of *CENP-C* and Sobic003G299500 haplotypes in  
1437 Region02 (only haplotypes XI/XII/XIII and haplotype XIV have evidence of  
1438 expression). **Panel (D):** Sugarcane ortholog of Sobic003G299500 found in the  
1439 sugarcane R570 BAC library. **Panel (E):** Transcripts from sugarcane SP80-3280  
1440 mapped against the CDS of sugarcane *CENP-C* haplotypes from Region01. **Panel**  
1441 **(F):** Transcripts from sugarcane SP80-3280 mapped against the sugarcane  
1442 chimerical paralogs of *CENP-C* and Sobic003G299500. As evidence of fusion



1443 gene formation, the transcripts show the fusion point of the paralogs. **Panel (G):**  
1444 Transcripts from sugarcane SP80-3280 mapped against the CDS of the sugarcane  
1445 R570 ortholog of Sobic003G299500.  
1446 Figure 5. Ploidy and dosage in the sugarcane genomic DNA (BACs) and  
1447 SuperMASSA estimation. The location of each SNP is shown by one haplotype  
1448 from Region01 and one haplotype from Region02. “SuperMASSA Best Ploidy”  
1449 means the SuperMASSA best ploidy with a posteriori probability of >0.8.  
1450 “SuperMASSA Expected Ploidy” means we fixed the ploidy of the loci in  
1451 SuperMASSA according to the BAC-FISH and BAC sequencing results. “Genomic  
1452 Ploidy” means the ploidy of the loci according to the BAC-FISH and BAC  
1453 sequencing results. “\*” means the SNP was found only in the transcriptome.  
1454 **Figure 6. Linkage map for the duplicated region.** Schematic representation of a  
1455 multiple sugarcane linkage map for sugarcane variety SP80-3280 with information  
1456 about the sugarcane genome (BACs).  
1457  
1458  
1459

1460 **TABLES**

1461 **Table 1.** Genomic frequencies of the SNPs in the *HP600* haplotypes in Region01 in the genome and transcriptome. The  
 1462 global expression (in diverse tissues) was used to determine whether the genomic frequency could explain the  
 1463 transcription frequency ( $H_0$ ). The binomial test was used to verify  $H_0$ . The highlighted p-values reflect the acceptance of  
 1464  $H_0$ .

| SNP | Name | Change           | Polymorphism Type        | Position | Coverage | Variant Coverage | Genomic Detected | Transcriptome Proportion | Missing haplotype for more common SNP |         |                    |                         | Missing haplotype for variant SNP |         |                    |                         |
|-----|------|------------------|--------------------------|----------|----------|------------------|------------------|--------------------------|---------------------------------------|---------|--------------------|-------------------------|-----------------------------------|---------|--------------------|-------------------------|
|     |      |                  |                          |          |          |                  |                  |                          | Genomic Variant                       | Genomic | Genomic Proportion | P-value (binomial test) | Genomic Variant                   | Genomic | Genomic Proportion | P-value (binomial test) |
| 1   | C    | G -> C           | SNP (transversion)       | 12       | 443      | 101              | Yes              | 0.23                     | 1                                     | 7       | 0.125              | 2.32E-09                | 2                                 | 6       | 0.25               | 2.98E-01*               |
| 2   | -    | -C               | Deletion                 | 78       | 515      | 28               | Yes              | 0.05                     | 1                                     | 7       | 0.125              | 1.13E-07                | 2                                 | 6       | 0.25               | 4.76E-32                |
| 3   | T    | C -> T           | SNP (transition)         | 133      | 542      | 38               | Yes              | 0.07                     | 1                                     | 7       | 0.125              | 5.16E-05                | 2                                 | 6       | 0.25               | 1.62E-27                |
| 4   | A    | G -> A           | SNP (transition)         | 153      | 577      | 33               | Yes              | 0.06                     | 1                                     | 7       | 0.125              | 9.76E-08                | 2                                 | 6       | 0.25               | 1.56E-34                |
| 5   | TT   | GG -> TT         | Substitution             | 166      | 699      | 137              | Yes              | 0.2                      | 1                                     | 7       | 0.125              | 1.18E-07                | 2                                 | 6       | 0.25               | 8.85E-04                |
| 6   | T    | C -> T           | SNP (transition)         | 263      | 569      | 55               | No               | 0.1                      | 1                                     | 7       | 0.125              | 4.23E-02                | 1                                 | 7       | 0.125              | 4.23E-02                |
| 7   |      | (GAG)3 -> (GAG)2 | Deletion (tandem repeat) | 283      | 654      | 42               | No               | 0.06                     | 1                                     | 7       | 0.125              | 4.35E-07                | 1                                 | 7       | 0.125              | 4.35E-07                |
| 8   | C    | T -> C           | SNP (transition)         | 429      | 849      | 83               | No               | 0.1                      | 1                                     | 7       | 0.125              | 1.68E-02                | 1                                 | 7       | 0.125              | 1.68E-02                |
| 9   | A    | G -> A           | SNP (transition)         | 434      | 993      | 69               | No               | 0.07                     | 1                                     | 7       | 0.125              | 1.68E-08                | 1                                 | 7       | 0.125              | 1.68E-08                |
| 10  | C    | G -> C           | SNP (transversion)       | 436      | 1035     | 275              | Yes              | 0.27                     | 2                                     | 6       | 0.25               | 2.51E-01*               | 3                                 | 5       | 0.375              | 1.196E-13               |
| 11  | T    | G -> T           | SNP (transversion)       | 463      | 936      | 56               | No               | 0.06                     | 1                                     | 7       | 0.125              | 5.11E-11                | 1                                 | 7       | 0.125              | 5.11E-11                |
| 12  | A    | C -> A           | SNP (transversion)       | 519      | 679      | 57               | No               | 0.08                     | 1                                     | 7       | 0.125              | 9.10E-04                | 1                                 | 7       | 0.125              | 9.10E-04                |

1465

1466 **Table 2.** Genomic frequencies of the SNPs in the *CENP-C* haplotypes in Region01 and Region02 in the genome and  
 1467 transcriptome. The global expression (in diverse tissues) was used to determine whether the genomic frequency could  
 1468 explain the transcription frequency ( $H_0$ ). The binomial test was used to verify  $H_0$ . The highlighted p-values reflect the  
 1469 acceptance of  $H_0$ .

| SNP | Name | Change   | Polymorphism Type  | Position | Coverage | Variant Coverage | Genomic Detected  | Transcriptome Proportion | Missing haplotype for more common SNP |         |                    |                         | Missing haplotype for variant SNP |         |                    |                         |
|-----|------|----------|--------------------|----------|----------|------------------|-------------------|--------------------------|---------------------------------------|---------|--------------------|-------------------------|-----------------------------------|---------|--------------------|-------------------------|
|     |      |          |                    |          |          |                  |                   |                          | Genomic Variant                       | Genomic | Genomic Proportion | P-value (binomial test) | Genomic Variant                   | Genomic | Genomic Proportion | P-value (binomial test) |
| 1   | G    | C -> G   | SNP (transversion) | 106      | 16       | 13               | Yes               | 0.81                     | 5                                     | 3       | 0.63               | 1.95E-01*               | 4                                 | 4       | 0.5                | 2.13E-02                |
| 2   | G    | A -> G   | SNP (transition)   | 150      | 19       | 8                | Yes               | 0.42                     | 1                                     | 7       | 0.13               | 1.25E-03                | 2                                 | 6       | 0.25               | 1.08E-01*               |
| 3   | C    | G -> C   | SNP (transversion) | 246      | 34       | 7                | Yes               | 0.21                     | 1                                     | 7       | 0.13               | 1.87E-01*               | 2                                 | 6       | 0.25               | 6.93E-01*               |
| 4   | T    | A -> T   | SNP (transversion) | 369      | 65       | 7                | Yes               | 0.11                     | 1                                     | 7       | 0.13               | 8.51E-01*               | 2                                 | 6       | 0.25               | 6.14E-03                |
| 5   | A    | G -> A   | SNP (transition)   | 371      | 68       | 19               | No                | 0.28                     | 1                                     | 7       | 0.13               | 6.21E-04                | 1                                 | 7       | 0.13               | 6.21E-04                |
| 6   | C    | T -> C   | SNP (transition)   | 390      | 64       | 15               | No                | 0.23                     | 1                                     | 7       | 0.13               | 1.32E-02                | 1                                 | 7       | 0.13               | 1.32E-02                |
| 7   | G    | T -> G   | SNP (transversion) | 513      | 46       | 12               | Yes               | 0.26                     | 3                                     | 5       | 0.38               | 1.28E-01*               | 4                                 | 4       | 0.5                | 1.64E-03                |
| 8   | A    | G -> A   | SNP (transition)   | 518      | 45       | 10               | Yes               | 0.22                     | 2                                     | 6       | 0.25               | 7.34E-01*               | 3                                 | 5       | 0.375              | 4.40E-02                |
| 9   | T    | G -> T   | SNP (transversion) | 731      | 54       | 8                | Yes               | 0.15                     | 2                                     | 6       | 0.25               | 1.14E-01*               | 3                                 | 5       | 0.375              | 3.58E-04                |
| 10  | C    | A -> C   | SNP (transversion) | 1008     | 56       | 9                | No                | 0.16                     | 1                                     | 7       | 0.13               | 4.17E-01*               | 1                                 | 7       | 0.13               | 4.17E-01*               |
| 11  | T    | C -> T   | SNP (transition)   | 1061     | 91       | 29               | Yes               | 0.32                     | 2                                     | 6       | 0.25               | 1.46E-01*               | 3                                 | 5       | 0.375              | 2.81E-01*               |
| 12  | T    | C -> T   | SNP (transition)   | 1088     | 77       | 41               | Yes               | 0.53                     | 4                                     | 4       | 0.50               | 6.48E-01*               | 3                                 | 5       | 0.375              | 6.37E-03                |
| 13  | T    | C -> T   | SNP (transition)   | 1190     | 76       | 9                | Yes               | 0.12                     | 2                                     | 6       | 0.25               | 7.49E-03                | 3                                 | 5       | 0.375              | 1.10E-06                |
| 14  | A    | G -> A   | SNP (transition)   | 1209     | 76       | 20               | No                | 0.26                     | 1                                     | 7       | 0.13               | 1.31E-03                | 1                                 | 7       | 0.13               | 1.31E-03                |
| 15  | T    | A -> T   | SNP (transversion) | 1251     | 62       | 10               | Yes               | 0.16                     | 2                                     | 6       | 0.25               | 1.41E-01*               | 3                                 | 5       | 0.375              | 3.29E-04                |
| 16  | G    | A -> G   | SNP (transition)   | 1255     | 62       | 55               | Yes               | 0.89                     | 6                                     | 2       | 0.75               | 1.19E-02                | 5                                 | 3       | 0.625              | 5.15E-06                |
| 17  |      | -ATG     | Deletion           | 1307     | 75       | 9                | Yes               | 0.12                     | 1                                     | 7       | 0.13               | 1.00E+00*               | 2                                 | 6       | 0.25               | 7.38E-03                |
| 18  | G    | A -> G   | SNP (transition)   | 1314     | 90       | 23               | Yes               | 0.26                     | 1                                     | 7       | 0.13               | 6.50E-04                | 2                                 | 6       | 0.25               | 9.03E-01*               |
| 19  | G    | T -> G   | SNP (transversion) | 1347     | 103      | 13               | Yes               | 0.13                     | 2                                     | 6       | 0.25               | 2.88E-03                | 3                                 | 5       | 0.375              | 3.09E-08                |
| 20  | A    | T -> A   | SNP (transversion) | 1384     | 101      | 37               | Yes               | 0.37                     | 1                                     | 7       | 0.13               | 5.30E-10                | 2                                 | 6       | 0.25               | 1.09E-02                |
| 21  | G    | C -> G   | SNP (transversion) | 1424     | 80       | 9                | No                | 0.11                     | 1                                     | 7       | 0.13               | 8.66E-01*               | 1                                 | 7       | 0.13               | 8.66E-01*               |
| 22  | A    | C -> A   | SNP (transversion) | 1437     | 84       | 10               | Yes               | 0.12                     | 1                                     | 7       | 0.13               | 1.00E+00*               | 2                                 | 6       | 0.25               | 5.12E-03                |
| 23  | TT   | AA -> TT | Substitution       | 1481     | 62       | 7                | No                | 0.11                     | 1                                     | 7       | 0.13               | 1.00E+00*               | 1                                 | 7       | 0.13               | 1.00E+00*               |
| 24  | G    | A -> G   | SNP (transition)   | 1527     | 106      | 90               | Yes (duplication) | 0.85                     |                                       |         |                    |                         |                                   |         |                    |                         |
| 25  | C    | T -> C   | SNP (transition)   | 1540     | 139      | 86               | Yes (duplication) | 0.62                     |                                       |         |                    |                         |                                   |         |                    |                         |

|    |   |        |                    |      |     |     |                   |      |   |   |      |           |   |   |      |           |  |  |
|----|---|--------|--------------------|------|-----|-----|-------------------|------|---|---|------|-----------|---|---|------|-----------|--|--|
| 26 | A | T -> A | SNP (transversion) | 1584 | 253 | 235 | Yes (duplication) | 0.93 |   |   |      |           |   |   |      |           |  |  |
| 27 | A | G -> A | SNP (transition)   | 1638 | 247 | 39  | Yes (duplication) | 0.16 |   |   |      |           |   |   |      |           |  |  |
| 28 | C | A -> C | SNP (transversion) | 1648 | 209 | 106 | Yes (duplication) | 0.51 |   |   |      |           |   |   |      |           |  |  |
| 29 | A | C -> A | SNP (transversion) | 1739 | 122 | 16  | Yes (duplication) | 0.13 |   |   |      |           |   |   |      |           |  |  |
| 30 | T | C -> T | SNP (transition)   | 1751 | 132 | 32  | Yes (duplication) | 0.24 |   |   |      |           |   |   |      |           |  |  |
| 31 | A | G -> A | SNP (transition)   | 1753 | 138 | 16  | Yes (duplication) | 0.12 |   |   |      |           |   |   |      |           |  |  |
| 32 | A | C -> A | SNP (transversion) | 1762 | 131 | 21  | No (duplication)  | 0.16 |   |   |      |           |   |   |      |           |  |  |
| 33 | T | A -> T | SNP (transversion) | 1776 | 125 | 75  | Yes (duplication) | 0.6  |   |   |      |           |   |   |      |           |  |  |
| 34 | C | G -> C | SNP (transversion) | 1796 | 88  | 31  | No (duplication)  | 0.35 |   |   |      |           |   |   |      |           |  |  |
| 35 | G | C -> G | SNP (transversion) | 1808 | 37  | 25  | Yes               | 0.68 | 4 | 3 | 0.57 | 0.00E+00* | 4 | 4 | 0.57 | 8.90E-01* |  |  |
| 36 | T | C -> T | SNP (transition)   | 1808 | 78  | 41  | Yes (duplication) | 0.53 |   |   |      |           |   |   |      |           |  |  |
| 37 | T | C -> T | SNP (transition)   | 1814 | 78  | 27  | Yes (duplication) | 0.35 |   |   |      |           |   |   |      |           |  |  |
| 38 | T | C -> T | SNP (transition)   | 1827 | 68  | 7   | Yes (duplication) | 0.1  |   |   |      |           |   |   |      |           |  |  |
| 39 | A | T -> A | SNP (transversion) | 1830 | 65  | 8   | Yes (duplication) | 0.12 |   |   |      |           |   |   |      |           |  |  |
| 40 | A | G -> A | SNP (transition)   | 1839 | 62  | 23  | Yes (duplication) | 0.37 |   |   |      |           |   |   |      |           |  |  |
| 41 | A | G -> A | SNP (transition)   | 1853 | 52  | 6   | Yes (duplication) | 0.12 |   |   |      |           |   |   |      |           |  |  |
| 42 | C | A -> C | SNP (transversion) | 1866 | 47  | 30  | Yes (duplication) | 0.64 |   |   |      |           |   |   |      |           |  |  |
| 43 | A | C -> A | SNP (transversion) | 1910 | 152 | 34  | Yes (duplication) | 0.22 |   |   |      |           |   |   |      |           |  |  |
| 44 | A | G -> A | SNP (transition)   | 1917 | 158 | 103 | Yes (duplication) | 0.65 |   |   |      |           |   |   |      |           |  |  |
| 45 | G | T -> G | SNP (transversion) | 1922 | 165 | 110 | Yes (duplication) | 0.67 |   |   |      |           |   |   |      |           |  |  |
| 46 | T | A -> T | SNP (transversion) | 1938 | 170 | 41  | Yes (duplication) | 0.24 |   |   |      |           |   |   |      |           |  |  |
| 47 | A | C -> A | SNP (transversion) | 2039 | 196 | 37  | Yes (duplication) | 0.19 |   |   |      |           |   |   |      |           |  |  |
| 48 | T | C -> T | SNP (transition)   | 2043 | 196 | 143 | Yes (duplication) | 0.73 |   |   |      |           |   |   |      |           |  |  |
| 49 | G | T -> G | SNP (transversion) | 2080 | 177 | 88  | Yes (duplication) | 0.5  |   |   |      |           |   |   |      |           |  |  |
| 50 | C | A -> C | SNP (transversion) | 2123 | 126 | 89  | Yes (duplication) | 0.71 |   |   |      |           |   |   |      |           |  |  |

1470

## Region01

Hap I - Shy3280Sca006  
 Hap II - Shy178F10+Shy260F01  
 Hap III - Shy083P14  
 Hap IV - Shy281G09  
 Hap V - Shy038L23+Shy432H18  
 Hap VI - Shy098J09  
 Hap VII - Shy241H10+Shy064N22

*Sorghum bicolor* orthologue region Chr. 03

Hap VIII - Shy095J03  
 Hap IX - Shy255C13  
 Hap X - Shy231B24  
 Hap XI - Shy040F02  
 Hap XII - Shy285K15  
 Hap XIII - Shy452C23  
 Hap XIV - Shy276O20  
 Hap XV - Shy048L15+Shy431A16  
 Hap XVI - Shy035E13+Shy171E23+Shy218H04+Shy284G01

*Sorghum bicolor* orthologue Chr. 06

*Sorghum bicolor* orthologue Chr. 04

*Sorghum bicolor* orthologue Chr. 08

*Sorghum bicolor* orthologue Chr. 03

Orthologues

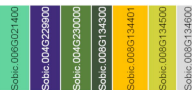

Orthologues

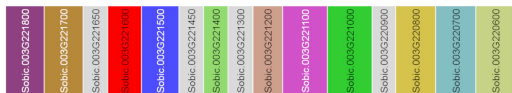

HP600<sub>nt</sub> CENPC

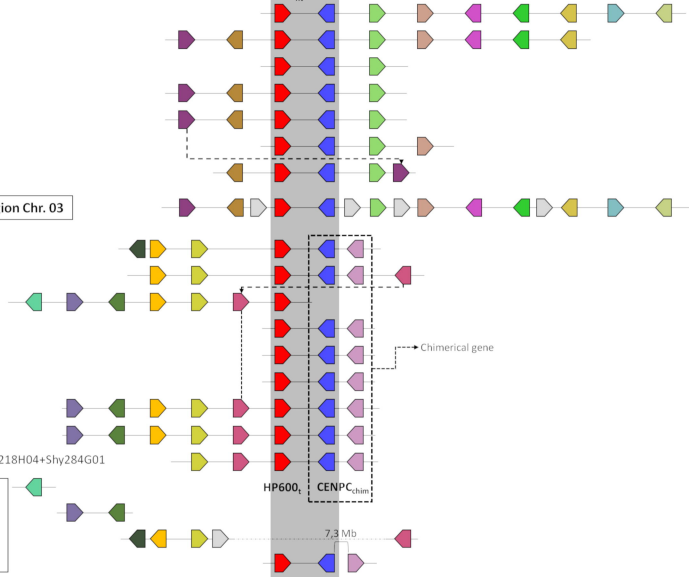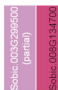

## Region01

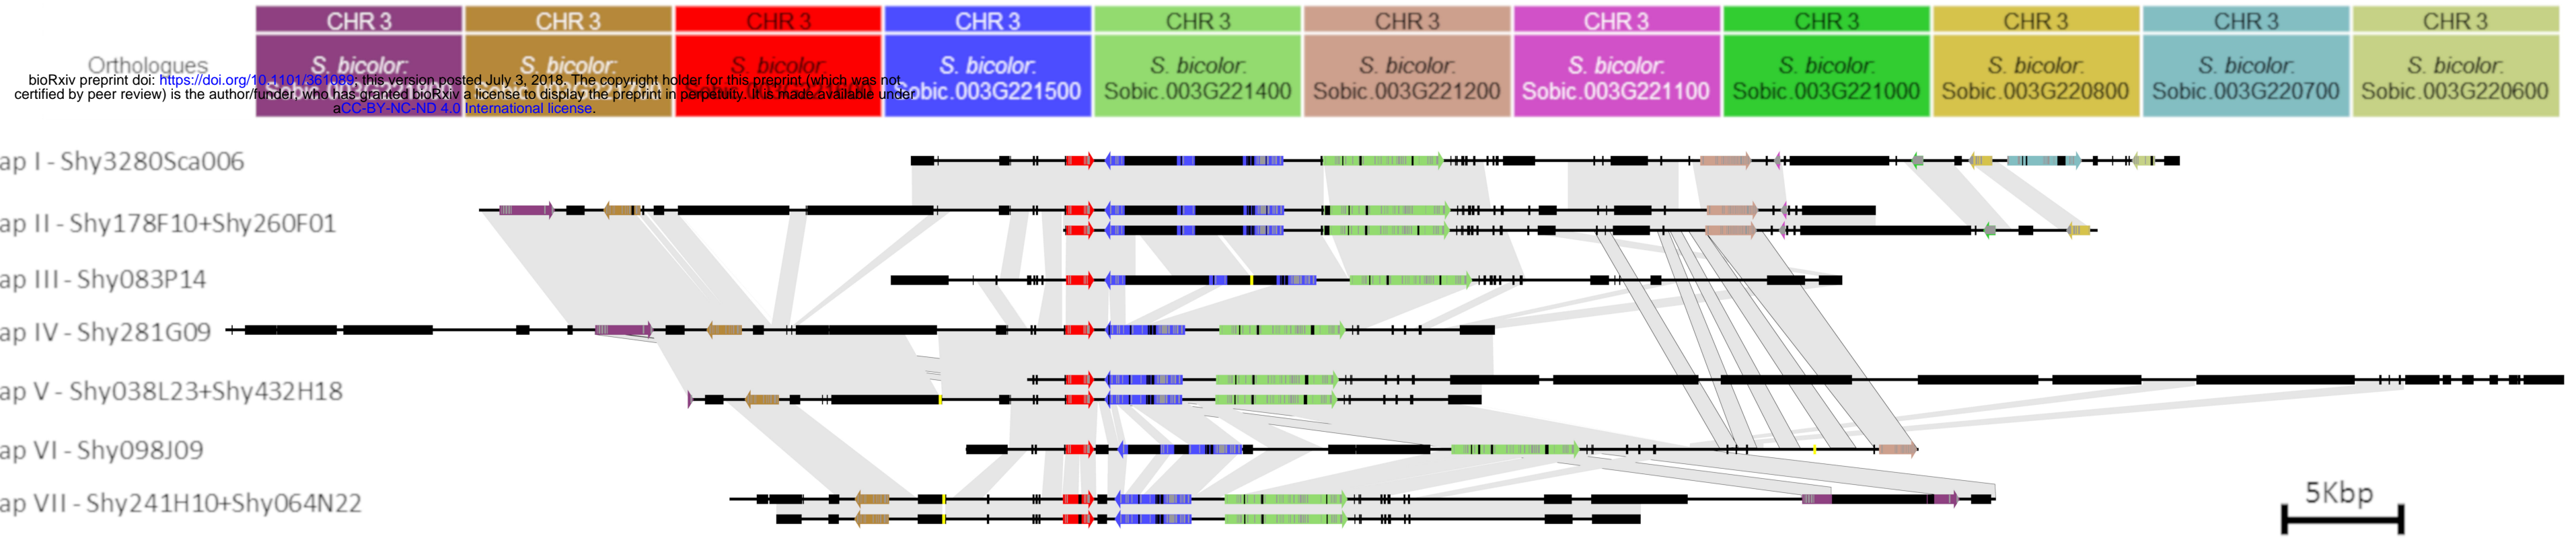

## Region02

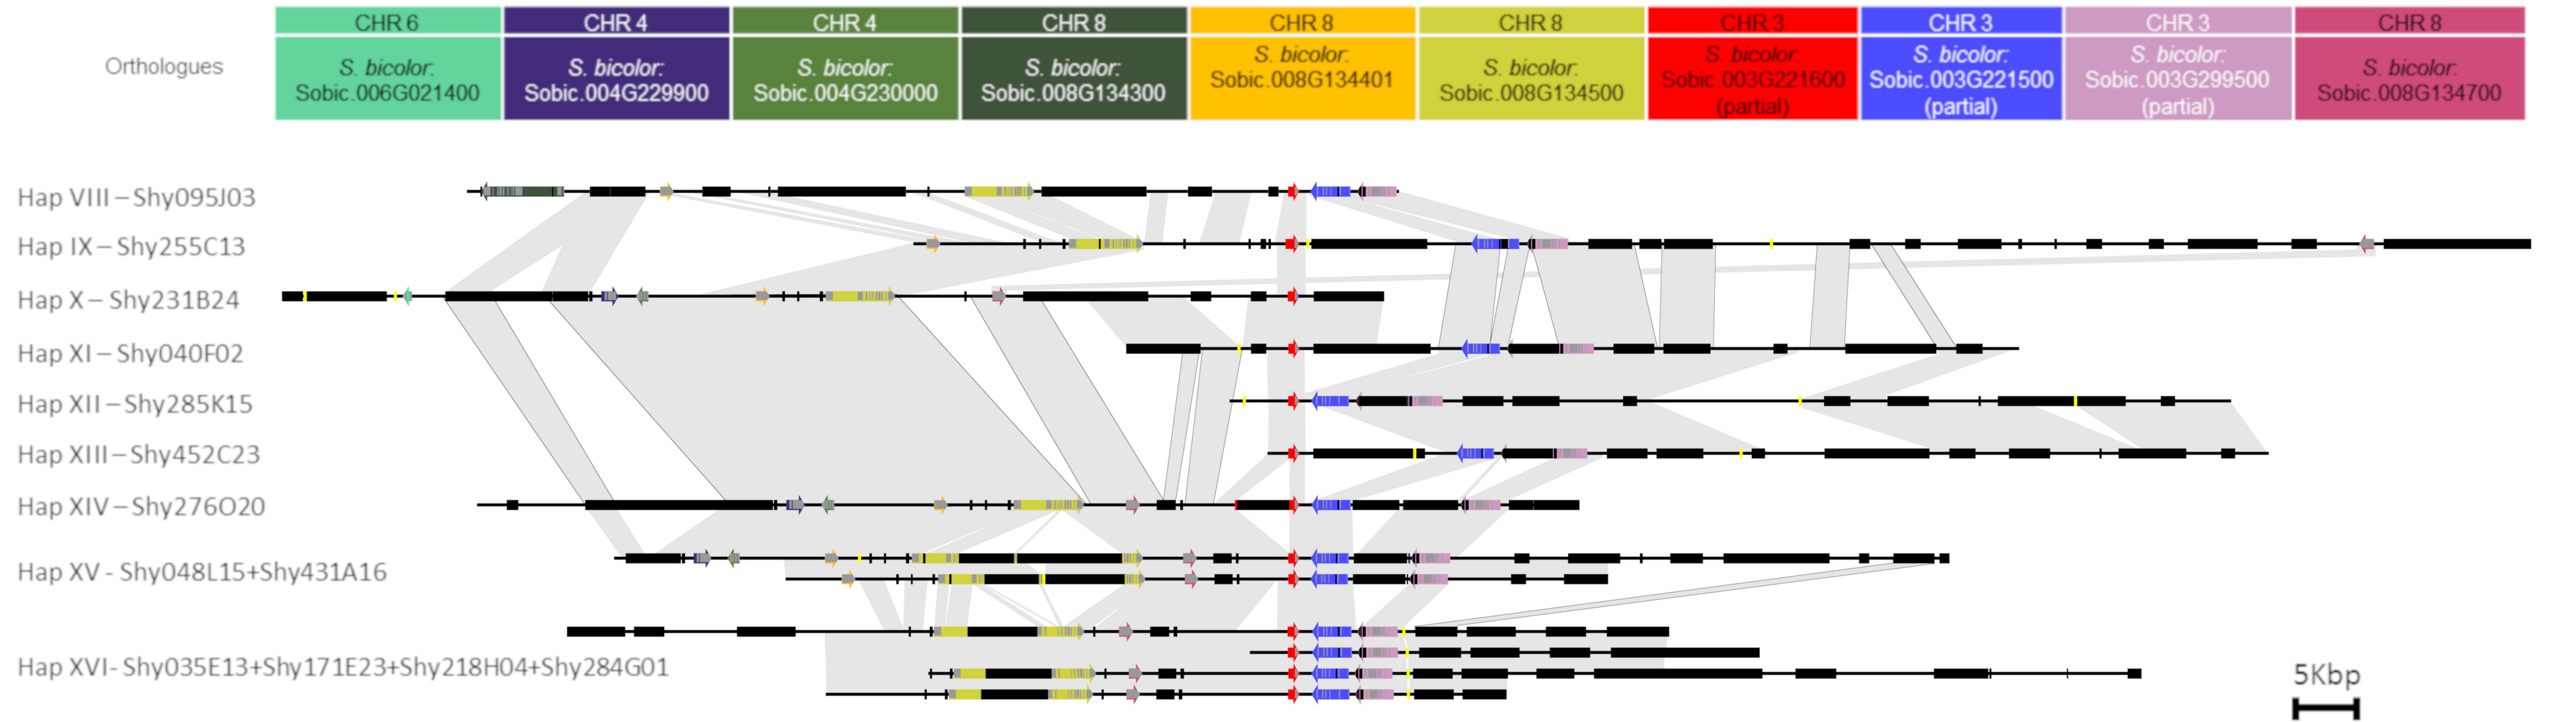

(A)

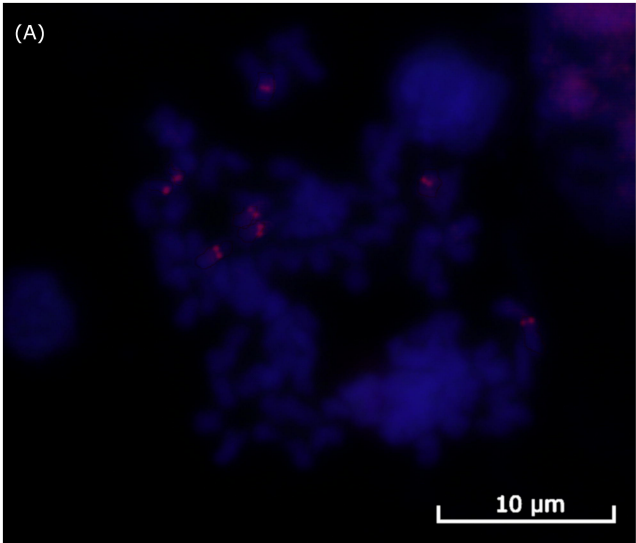

(B)

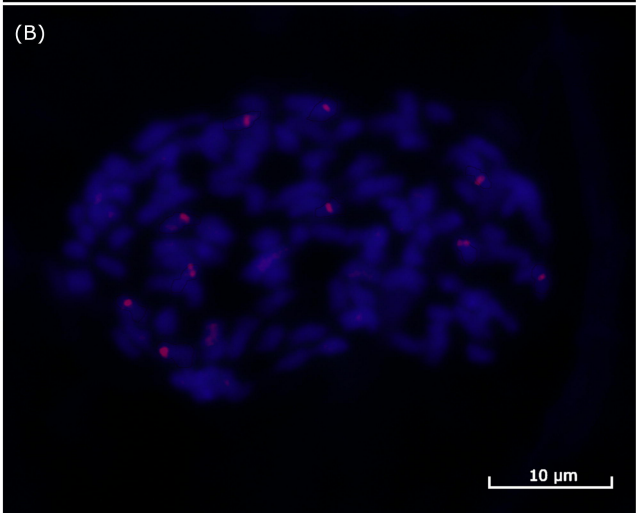





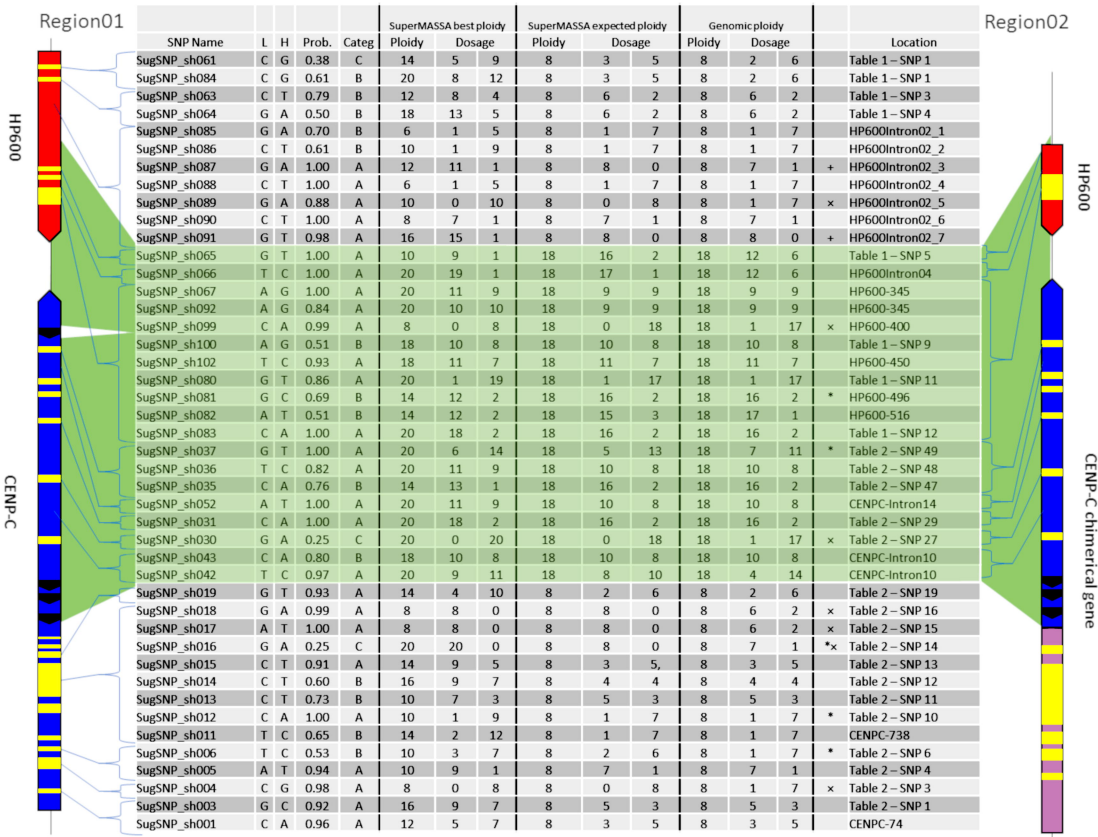

Physical map

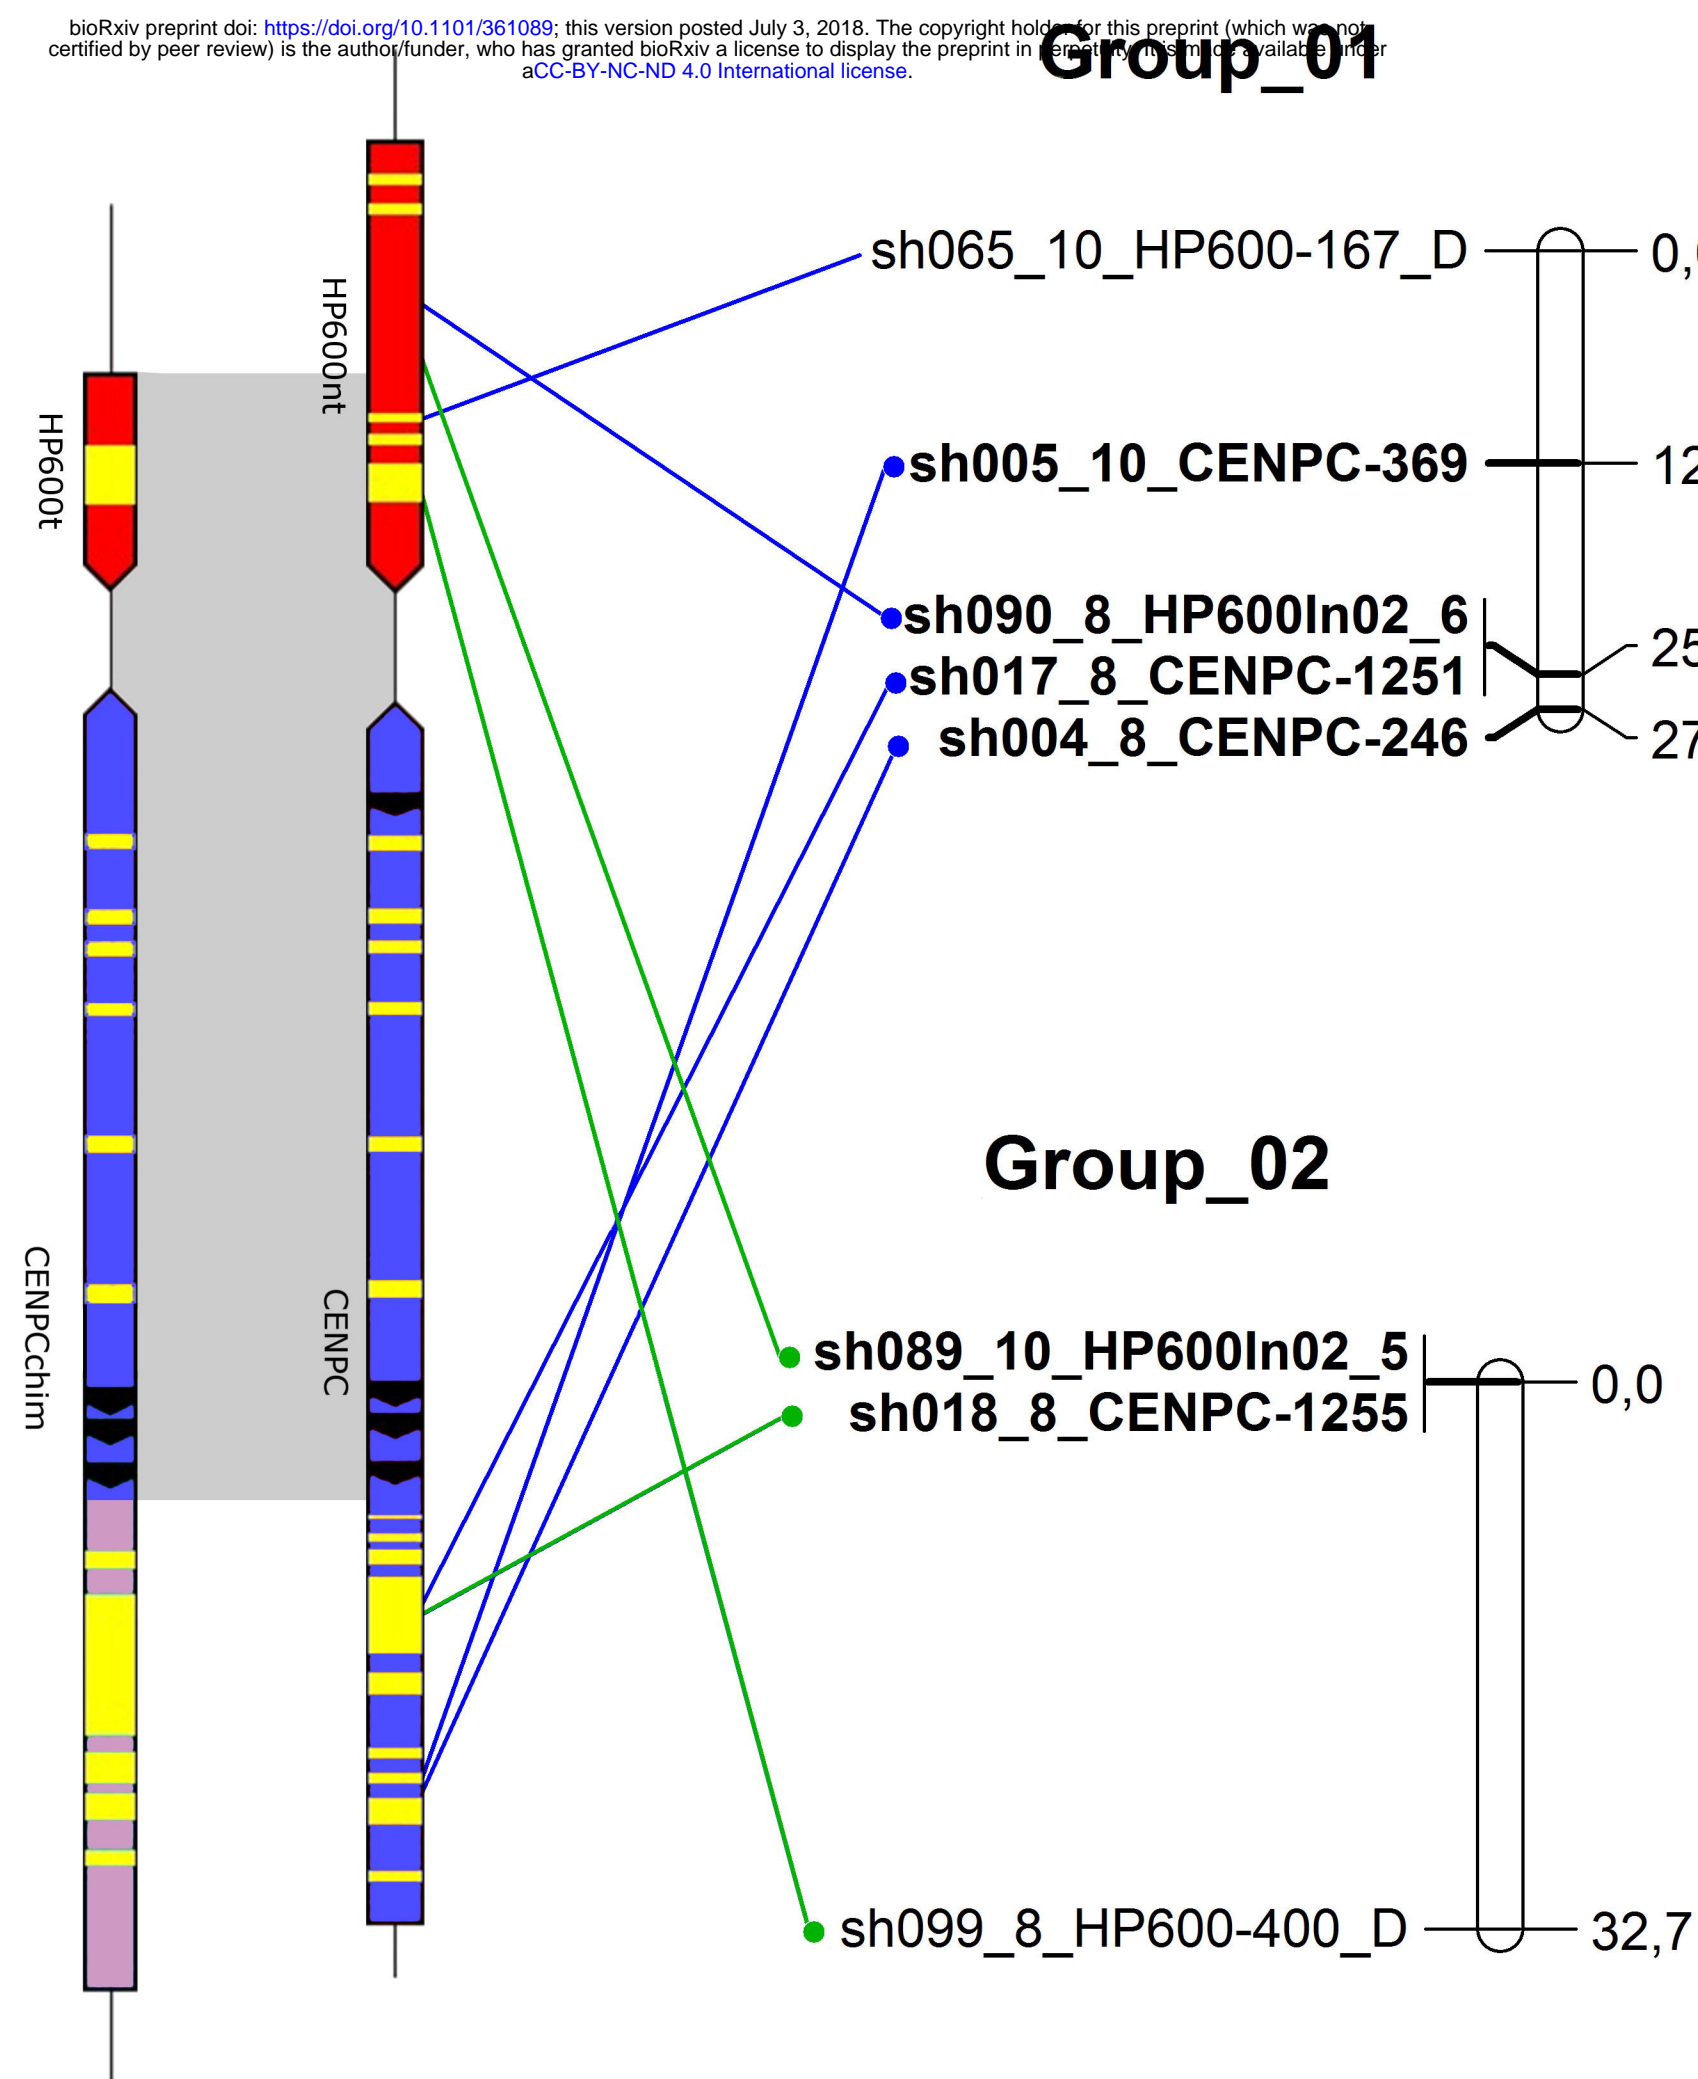

A - Two linkage groups first map

B - Two linkage groups without markers in duplication

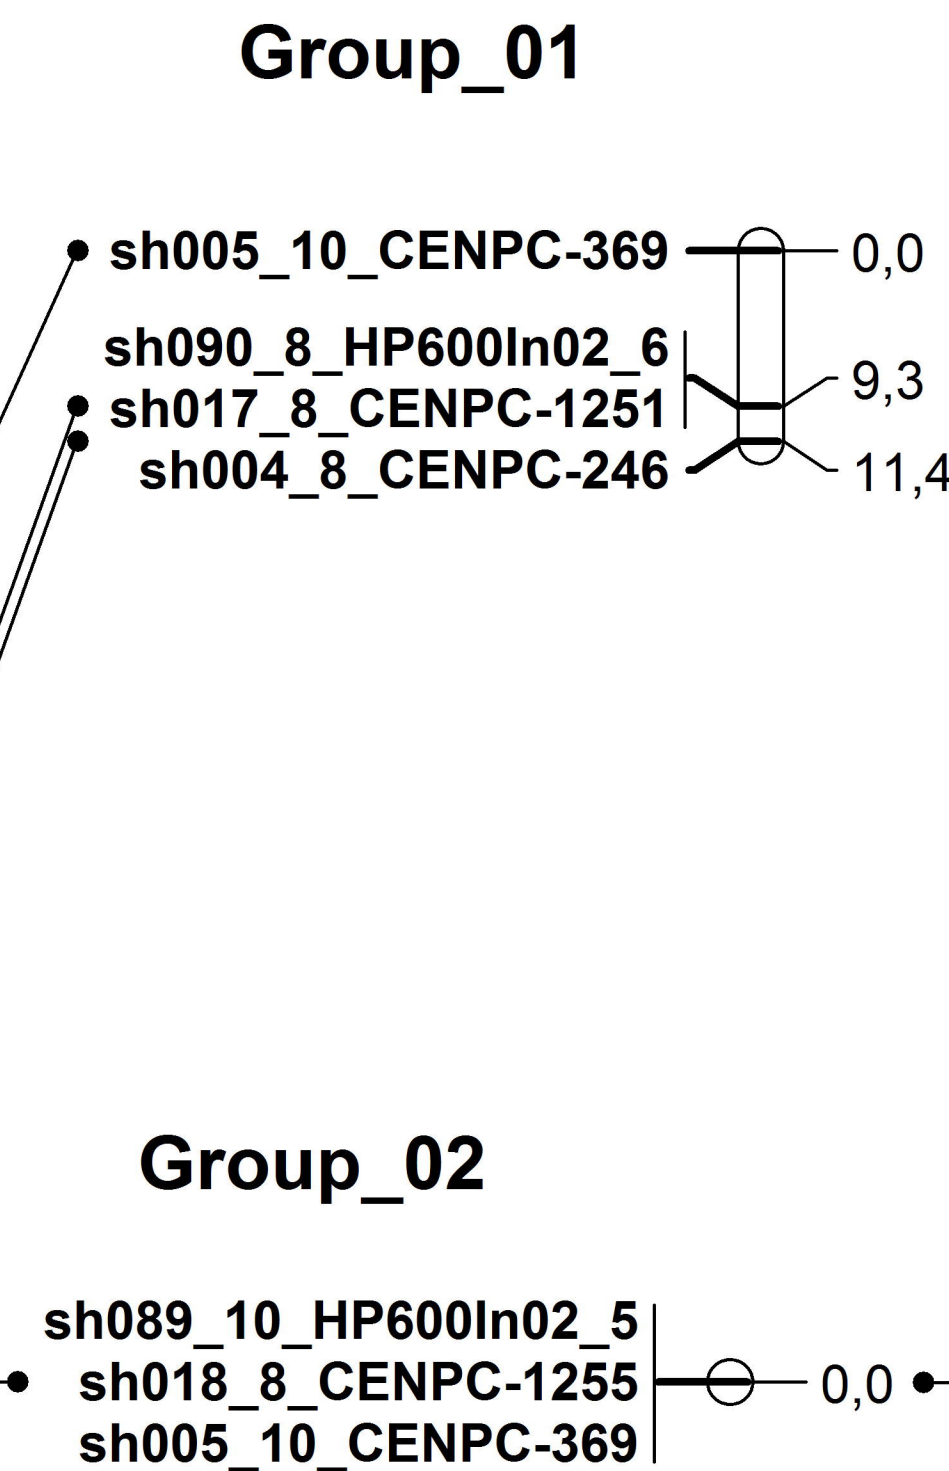

C - Two linkage groups without markers in the wrong order according to BACs

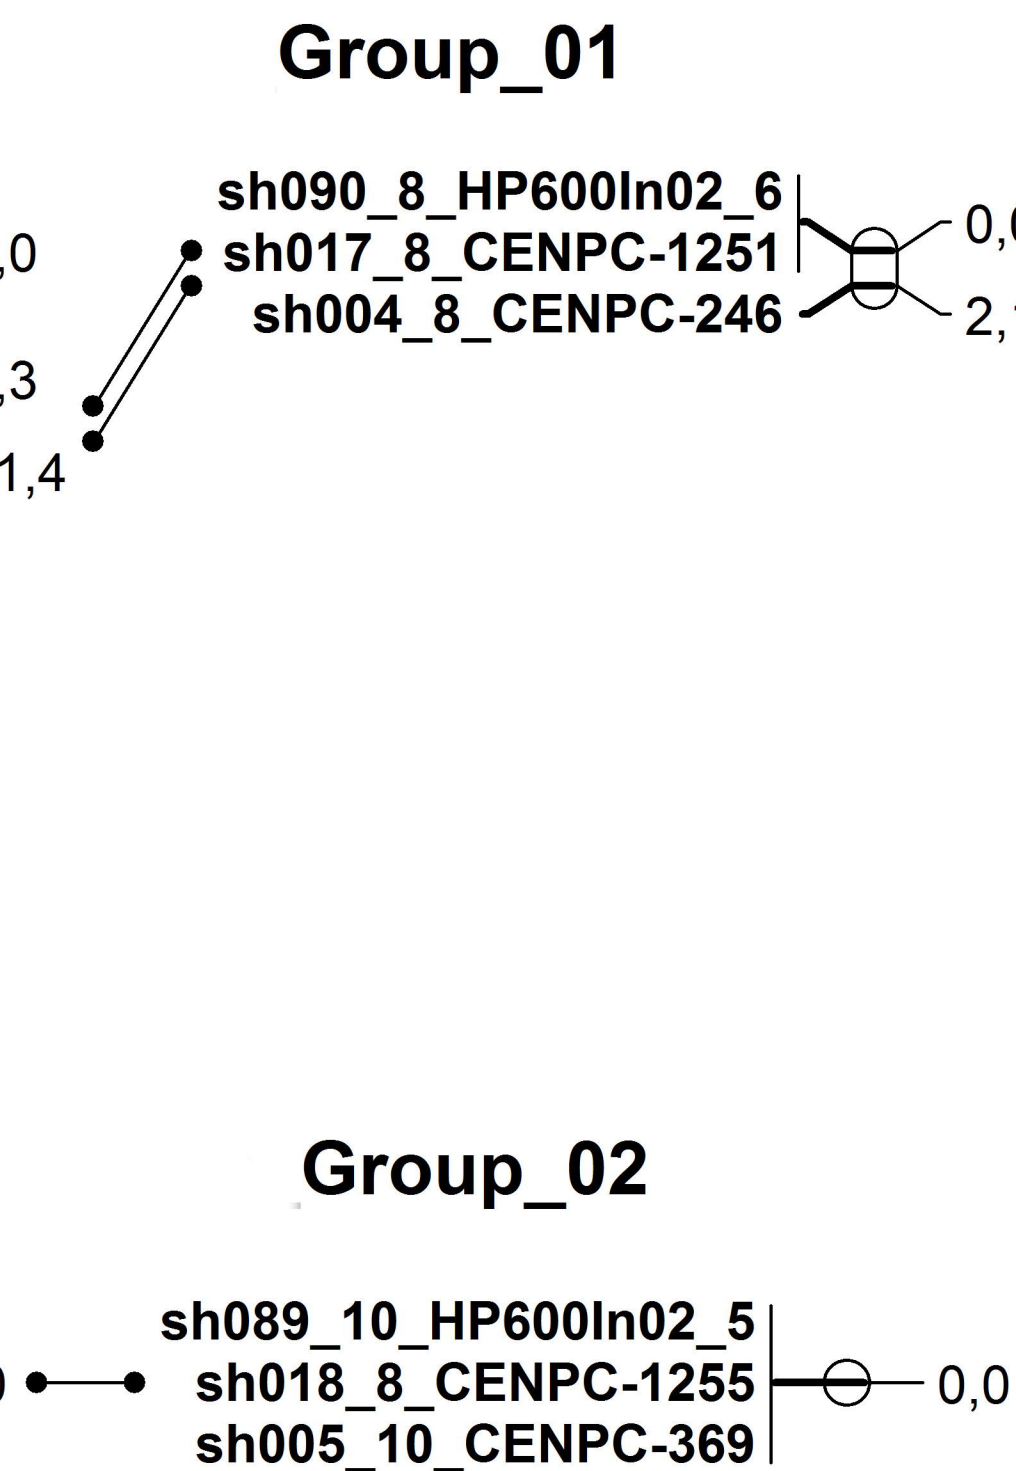

D - Trying to create one group with markers in correct order according to BACs

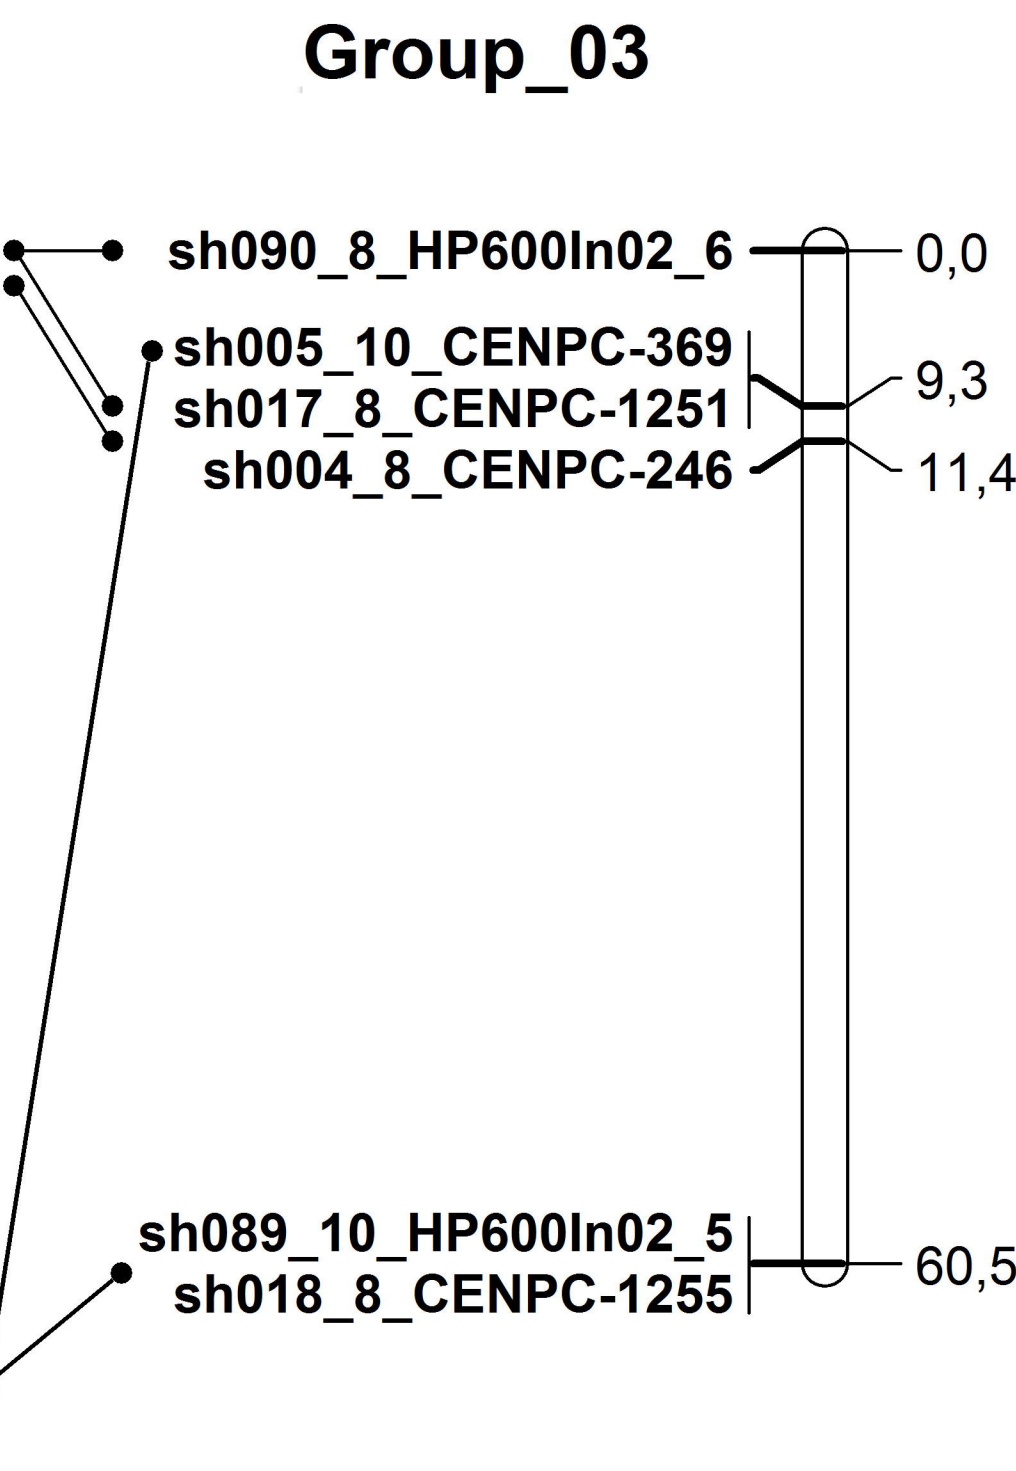

E- Best linkage group using all information about the region

Physical map

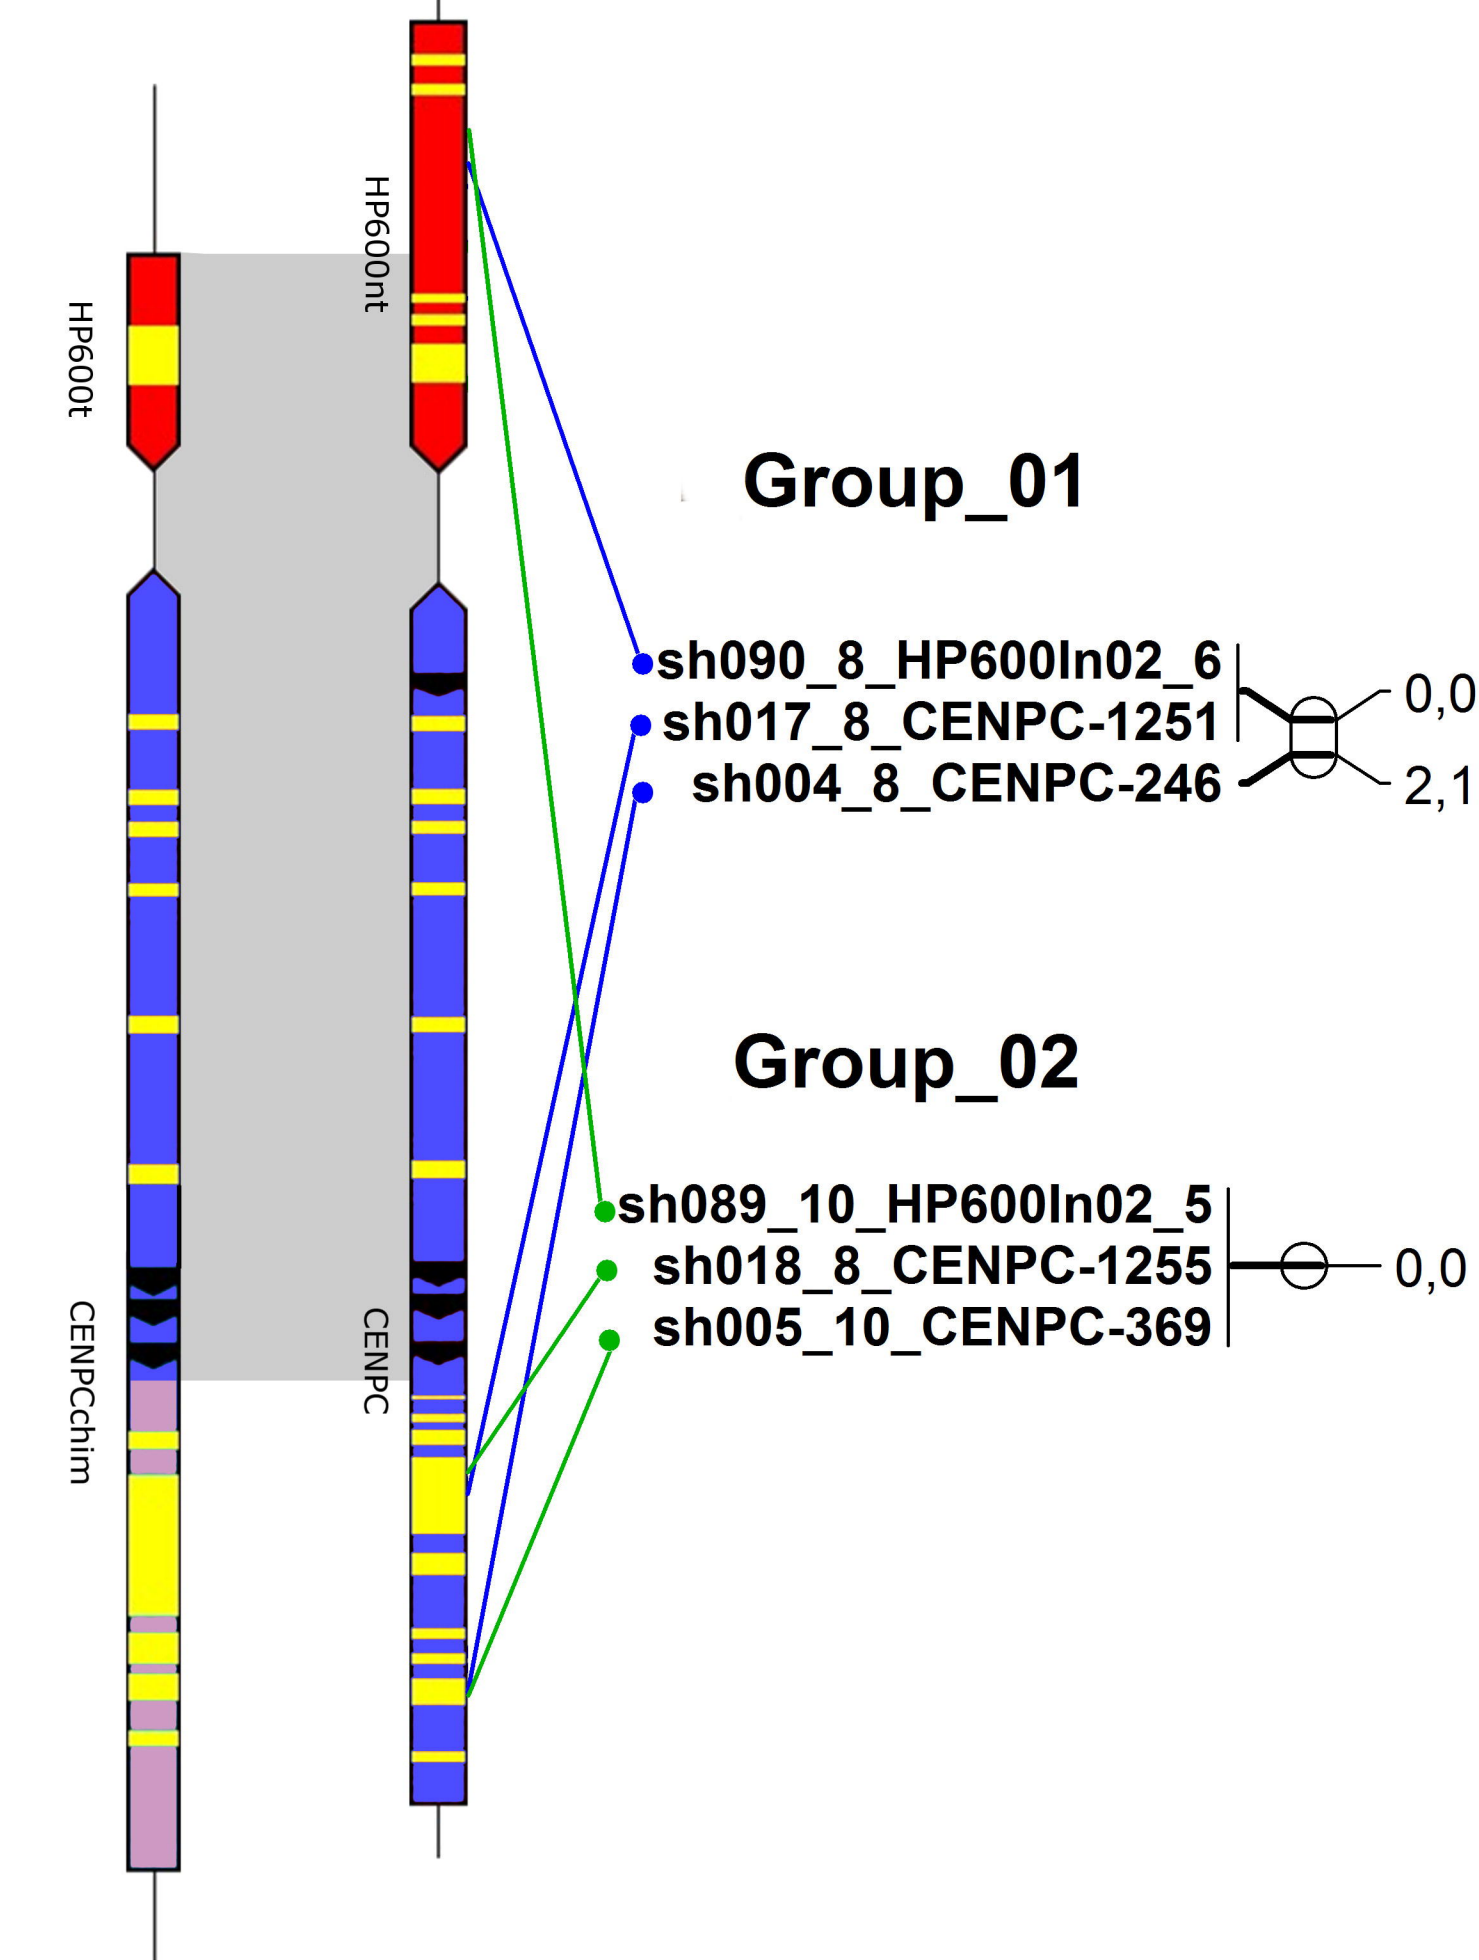

Source: https://www.biorxiv.org/content/biorxiv/early/2018/07/03/361089.full.pdf
